1                   **CTCF knockout in zebrafish induces alterations in**  
2                   **regulatory landscapes and developmental gene expression**

3  
4 Martin Franke<sup>#</sup>, Elisa De la Calle-Mustienes<sup>#</sup>, Ana Neto, Rafael D. Acemel, Juan J.  
5 Tena, José M. Santos-Pereira\* and José L. Gómez-Skarmeta\*

6  
7 Centro Andaluz de Biología del Desarrollo (CABD), Consejo Superior de Investigaciones  
8 Científicas/Universidad Pablo de Olavide, 41013 Seville, Spain

9  
10 <sup>#</sup> These authors contributed equally to this work

11  
12 \* Corresponding authors:

13  
14                   José M. Santos-Pereira  
15                   phone: +34 954 348 687  
16                   email: [jmsanper1@upo.es](mailto:jmsanper1@upo.es)

17  
18                   José L. Gómez-Skarmeta  
19                   phone: +34 954 348 948  
20                   email: [jlgomska@upo.es](mailto:jlgomska@upo.es)

21  
22  
23  
24 Word count: 3254

25 Number of figures: 4

26 **CTCF is an 11-zinc-finger DNA-binding protein that acts as a transcriptional repressor**  
27 **and insulator as well as an architectural protein required for 3D genome folding<sup>1-5</sup>. CTCF**  
28 **mediates long-range chromatin looping and is enriched at the boundaries of**  
29 **topologically associating domains, which are sub-megabase chromatin structures that**  
30 **are believed to facilitate enhancer-promoter interactions within regulatory landscapes**  
31 **<sup>6-12</sup>. Although CTCF is essential for cycling cells and developing embryos<sup>13,14</sup>, its *in vitro***  
32 **removal has only modest effects over gene expression<sup>5,15</sup>, challenging the concept that**  
33 **CTCF-mediated chromatin interactions and topologically associated domains are a**  
34 **fundamental requirement for gene regulation<sup>16-18</sup>. Here we link the loss of chromatin**  
35 **structure and gene regulation in an *in vivo* model and during animal development. We**  
36 **generated a *ctcf* knockout mutant in zebrafish that allows us to monitor the effect of**  
37 **CTCF loss of function during embryo patterning and organogenesis. CTCF absence**  
38 **leads to loss of chromatin structure in zebrafish embryos and affects the expression of**  
39 **thousands of genes, including many developmental genes. In addition, chromatin**  
40 **accessibility, both at CTCF binding sites and *cis*-regulatory elements, is severely**  
41 **compromised in *ctcf* mutants. Probing chromatin interactions from developmental**  
42 **genes at high resolution, we further demonstrate that promoters fail to fully establish**  
43 **long-range contacts with their associated regulatory landscapes, leading to altered**  
44 **gene expression patterns and disruption of developmental programs. Our results**  
45 **demonstrate that CTCF and topologically associating domains are essential to regulate**  
46 **gene expression during embryonic development, providing the structural basis for the**  
47 **establishment of developmental gene regulatory landscapes.**

48 Vertebrate genomes are folded within the nucleus in a hierarchical manner leading to  
49 different levels of chromatin structure that range from chromosome territories to  
50 nucleosomes<sup>19-23</sup>. At the Kilo- to Megabases scale, chromatin is organized in topologically  
51 associating domains (TADs)<sup>6-9</sup>. According to the current theory, TADs emerge when the  
52 cohesin complex, while extruding chromatin, is halted by the CTCF architectural protein<sup>24,25</sup>.  
53 Indeed, acute depletion of CTCF or cohesin in cultured cells lead to a severe loss of TAD  
54 insulation or the disappearance of all chromatin loops, respectively<sup>5,26</sup>. Recent evidences have  
55 suggested that TADs facilitate the contact of *cis*-regulatory elements (CREs) with promoters  
56 located within them, while preventing interactions with promoters located in neighboring TADs.  
57 In this sense, genomic structural variations that rearrange TAD boundaries lead to enhancer-  
58 promoter rewiring, alterations in gene expression and congenital malformations<sup>27-31</sup>. However,  
59 to what extent TADs are crucial for gene regulation is currently under debate. Depletion of  
60 CTCF in mammalian *in vitro* systems causes only modest transcriptional alterations<sup>5,15,32</sup>, in

61 agreement with some *in vivo* studies<sup>33,34</sup>. However, targeted deletion of several CTCF sites  
62 and quantitative gene expression analyses reveal loss of gene expression<sup>35-37</sup>. In fact, our  
63 understanding of CTCF function *in vivo* is limited due to its essential function during the cell  
64 cycle and the early embryonic lethality in mice<sup>13,14</sup>. Here, we analyze the genome-wide effect  
65 of CTCF knockout in developing zebrafish embryos, showing that chromatin structure is  
66 essential for the precise regulation of developmental genes and thus provides a scaffold for  
67 the establishment of developmental gene regulatory landscapes.

68

### 69 **Generation of a zebrafish *ctcf*<sup>-/-</sup> zygotic mutant**

70 In order to study the requirement of CTCF in an *in vivo* vertebrate model, we have generated  
71 a *ctcf* zygotic knockout mutant in zebrafish. Using CRISPR/Cas9 with two single guide RNAs  
72 (sgRNAs), we obtained heterozygous *ctcf*<sup>+/-</sup> adult individuals carrying a 260-bp deletion,  
73 encompassing exons 3 and 4 of the *ctcf* gene that leads to a premature stop codon within exon  
74 4. The expected truncated CTCF protein is depleted of all zinc finger domains, preventing  
75 CTCF binding to chromatin. While *Ctcf*<sup>-/-</sup> zygotic knockout mice die at peri-implantation  
76 stages<sup>14</sup>, zebrafish mutants undergo gastrulation and organogenesis and develop normally  
77 until pharyngula stages, around 24 hours-post-fertilization (hpf). At 24 hpf, *ctcf*<sup>-/-</sup> mutants are  
78 phenotypically indistinguishable from their heterozygous and wild-type siblings. However, at  
79 48 hpf, *ctcf*<sup>-/-</sup> embryos showed a clear phenotype that includes pigmentation defects, heart  
80 edema and reduced size of head and eyes (Fig. 1a), dying shortly after this stage.  
81 Immunofluorescence analysis of wild-type and *ctcf*<sup>-/-</sup> mutant embryos showed that CTCF  
82 protein was absent both at 24 and at 48 hpf (Fig. 1b), while maternal *ctcf* mRNA is detected at  
83 least until 75% of epiboly (8 hpf, gastrulation)<sup>38</sup>. This suggests that the late lethality of zebrafish  
84 *ctcf*<sup>-/-</sup> mutants compared to mice might be due to the presence of maternal CTCF protein for a  
85 longer time during early embryonic development. Therefore, our *ctcf*<sup>-/-</sup> zebrafish mutant  
86 provides a unique tool to examine the contribution of this protein in genome architecture, gene  
87 expression and body plan formation in a vertebrate model system. We therefore exploited this  
88 model using a combination of chromosome conformation capture, transcriptomic and  
89 epigenomic techniques.

90

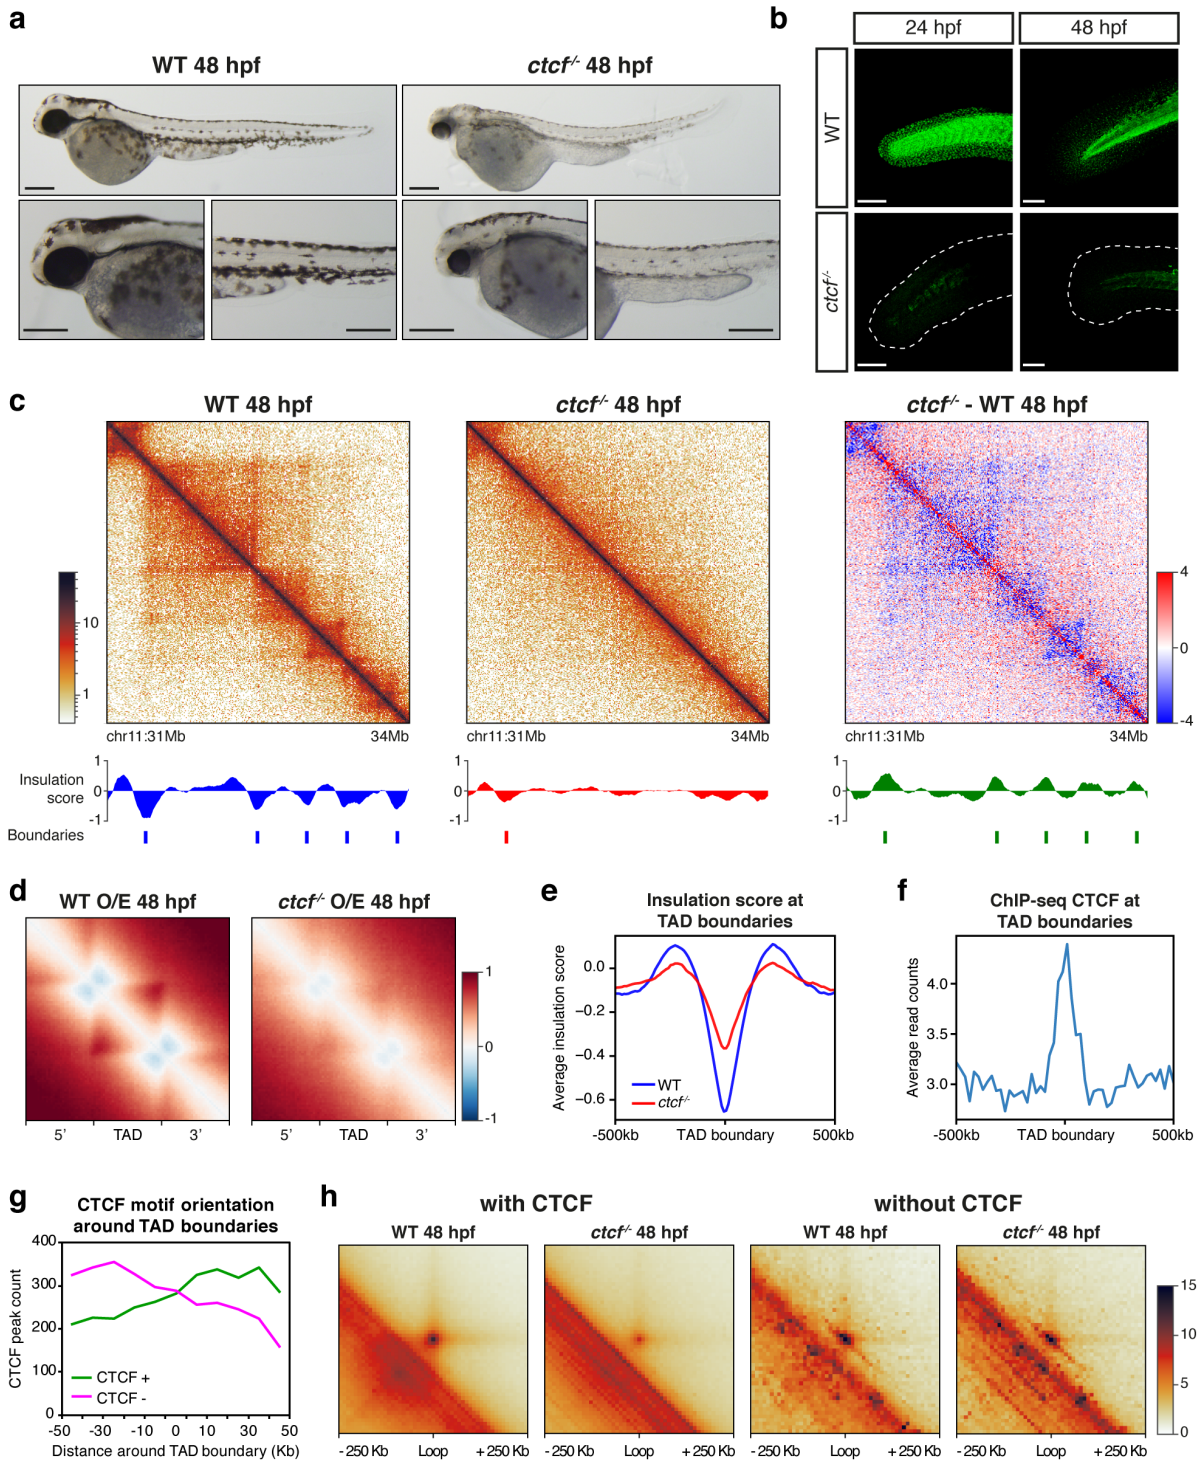

91

92 **Figure 1. Knockout of *ctcf* in zebrafish embryos disrupts chromatin structure.** **a**, Pictures of wild-type (WT)  
 93 and *ctcf*<sup>-/-</sup> zebrafish embryos at 48 hours post fertilization (hpf) showing mutant phenotypes, including reduced size  
 94 of head and eyes, heart edema and defective pigmentation. Scale bars represent 250  $\mu$ m. **b**, Whole-mount embryo  
 95 immunofluorescence of CTCF in WT and *ctcf*<sup>-/-</sup> zebrafish embryos at 24 and 48 hpf showing the absence of this  
 96 protein in the tail and fin fold in knockout mutants. Scale bars represent 100  $\mu$ m. **c**, HiC normalized contact maps  
 97 at 10 Kb resolution from WT and *ctcf*<sup>-/-</sup> zebrafish embryos, as well as the difference between them, at 48 hpf. A 3-  
 98 Mb genomic region is plotted, aligned with the insulation scores and the called topologically associating domain  
 99 (TAD) boundaries. **d**, Aggregate analysis of observed/expected HiC signal in WT and *ctcf*<sup>-/-</sup> embryos at 48 hpf for  
 100 the 2,438 TADs called in WT embryos, rescaled and surrounded by windows of the same size. **e**, Average insulation  
 101 score profiles of WT and *ctcf*<sup>-/-</sup> zebrafish embryos at 48 hpf around the TAD borders called in the WT. **f**, Average  
 102 CTCF ChIP-seq signal in WT embryos at 48 hpf around TAD boundaries. **g**, CTCF peak count of those peaks  
 103 containing CTCF motifs located in the positive (CTCF +) or negative (CTCF -) strands around TAD boundaries,



104 showing a clear preference for CTCF + motifs in the 3' side of the boundary and for CTCF - motifs in the 5' side of  
105 the boundary. **h**, Aggregate peak analysis of chromatin loops called by HiCCUPs with or without CTCF binding at  
106 48 hpf.  
107

## 108 **CTCF is required for chromatin organization in zebrafish embryos**

109 We first analyzed whether the absence of CTCF in zebrafish embryos caused loss of chromatin  
110 structure, as previously reported in *in vitro* models<sup>5,15</sup>. For this, we performed HiC experiments  
111 in wild-type and *ctcf*<sup>-/-</sup> whole embryos at 48 hpf and visualized the data at 10-Kb resolution.  
112 [Figure 1c](#) shows that chromatin structure was established at this stage in wild-type embryos,  
113 similar to previous reports<sup>39</sup>, detecting 2,438 TADs based on insulation scores<sup>40</sup>. Other 3D  
114 chromatin features commonly detected at this scale, such as loops and stripes, were also  
115 observed. In contrast, we found a general loss of chromatin structure in *ctcf*<sup>-/-</sup> embryos, leading  
116 to the detection of only 1,178 TADs and to a reduction of intra-TAD contacts and insulation in  
117 wild-type TADs ([Fig. 1c-e](#); [Extended Data Fig. 1a-d](#)). These data confirmed that CTCF is  
118 essential for 3D chromosome organization in zebrafish embryos, as described for other  
119 vertebrates including mammals and frogs<sup>5,15,41</sup>. Next, we analyzed A and B compartments in  
120 wild-type and *ctcf*<sup>-/-</sup> embryos and, although we found a similar distribution of AB compartments,  
121 we detected increased AB interactions and decreased compartmentalization strength in the  
122 mutants ([Extended Data Fig. 1e-g](#)). This contrasts with previous data in cultured cells<sup>5</sup> and  
123 suggests that CTCF may be required for higher order chromatin structure at least in this *in vivo*  
124 context.

125 We then profiled CTCF binding to chromatin in zebrafish embryos using ChIPmentation  
126 and found that wild-type TAD boundaries were enriched for CTCF binding, 97% of them  
127 containing CTCF sites ([Fig. 1f](#); [Extended Data Fig. 2a-b](#)). In addition, the consensus motifs of  
128 CTCF at these binding sites around TAD boundaries were preferentially located in a  
129 convergent orientation ([Fig. 1g](#)), consistent with previous observations<sup>6,10,39,42,43</sup>. Next, we  
130 called chromatin loops in wild-type embryos and detected 1,297 loops, 90% of which contained  
131 CTCF binding sites at least at one of the anchors ([Extended Data Fig. 2](#)). Interestingly,  
132 aggregate peak analysis of CTCF-containing chromatin loops showed a marked decrease in  
133 intensity in *ctcf*<sup>-/-</sup> mutants, while 10% of loops without CTCF remained largely unaffected by  
134 CTCF loss ([Fig. 1h](#)), suggesting that they may be formed by CTCF-independent mechanisms.  
135 Therefore, we conclude that CTCF is essential for the establishment of most chromatin loops  
136 in zebrafish embryos, similarly to other vertebrates<sup>5,41</sup>.

137

## 138 **Developmental gene expression requires CTCF**

139 To analyze the effects of CTCF absence over gene expression *in vivo*, we performed RNA-  
140 seq on whole embryos at 24 and 48 hpf. At 24 hpf, we detected 260 up- and 458 down-

141 regulated genes (Fig. 2a). However, at 48 hpf, we detected as much as 2,730 up- and 3,324  
142 down-regulated genes (Fig. 2b). Strikingly, while differentially expressed genes (DEGs) at 24  
143 hpf were enriched only in biological functions related to immune and DNA damage responses,  
144 DEGs at 48 hpf were enriched, among other general functions, in transcription regulation and  
145 developmental processes including skeletal muscle development or nervous system  
146 development (Fig. 2c-d). This indicates that CTCF is required for the expression of thousands  
147 of genes during zebrafish development, an impacting result that contrasts to previous  
148 observations in *in vitro* experimental setups showing alteration of a few hundred genes upon  
149 CTCF removal<sup>5,32</sup>. Next, we analyzed gene expression changes in the transition from 24 to 48  
150 hpf in wild-type embryos and found that genes that get activated in this period tend to be down-  
151 regulated in *ctcf*<sup>-/-</sup> embryos, and vice versa, indicating that many developmental genes fail to  
152 acquire their normal expression level during this developmental period (Extended Data Fig. 3).

153 We then explored the possible function of CTCF to directly regulate DEGs by analyzing  
154 its binding to their transcription start sites (TSSs). At 24 hpf, we found a clear bias of CTCF  
155 binding towards the TSS of down-regulated genes (83.8%) as compared to up-regulated genes  
156 (28.1%) (Fig. 2e-f). This confirms previous observations<sup>5,15</sup> and suggests distinct mechanisms  
157 of CTCF function at activated and repressed genes. By contrast, only 50.1% of down-regulated  
158 and 37.0% of up-regulated genes at 48 hpf showed CTCF binding at their TSSs (Fig. 2e-f).  
159 Interestingly, we observed that down-regulated genes that are enriched in developmental  
160 functions were mainly those without CTCF bound at their TSSs (Extended Data Fig. 4), raising  
161 the possibility that developmental genes could be de-regulated indirectly due to defects in  
162 chromatin folding. Altogether, these data show that CTCF absence leads to altered  
163 developmental gene expression that may account for the observed developmental  
164 abnormalities.

165

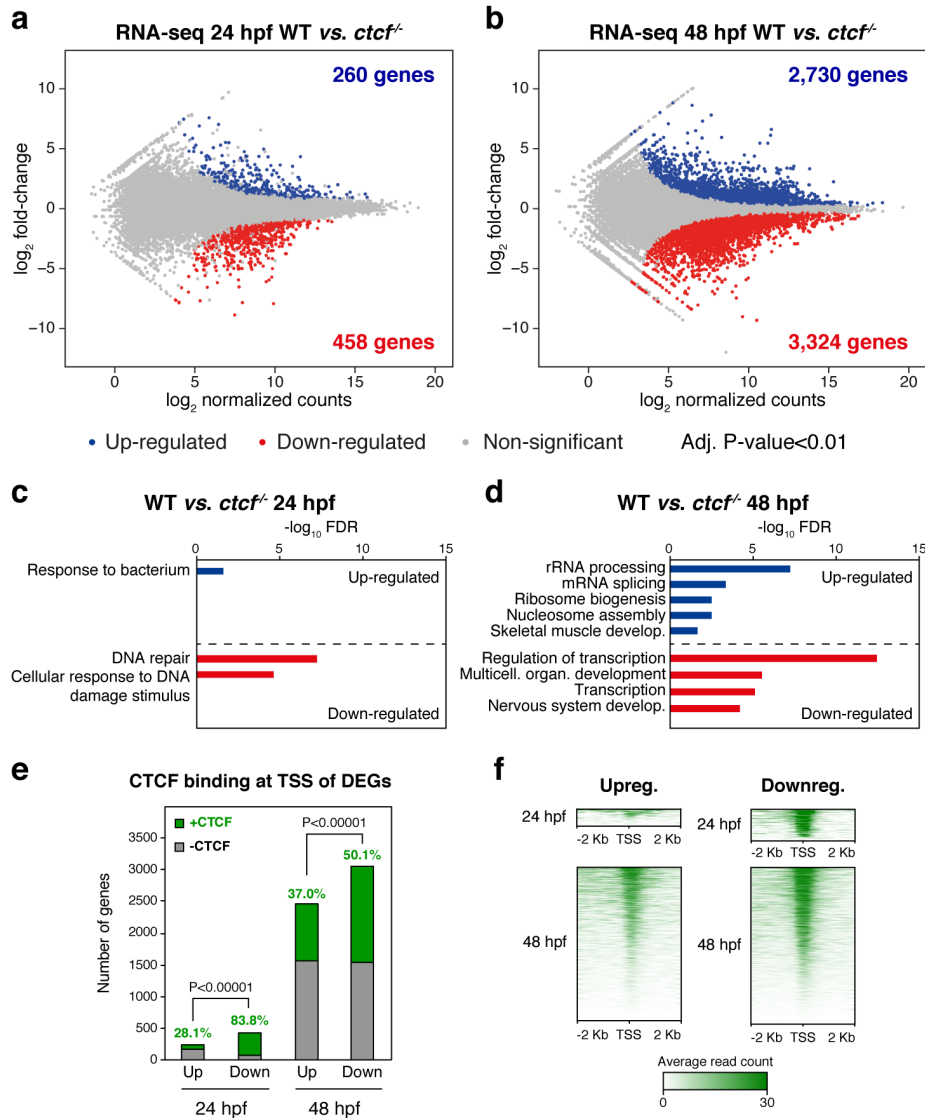

166

167 **Figure 2. CTCF absence in zebrafish embryos leads to altered developmental gene expression.** a-b,  
 168 Differential analyses of gene expression between WT and *ctcf*<sup>-/-</sup> embryos at 24 (a) and 48 hpf (b) from RNA-seq  
 169 data (n = 2 biological replicates per condition). The log<sub>2</sub> normalized read counts of WT transcripts versus the log<sub>2</sub>  
 170 fold-change of expression are plotted. Transcripts showing a statistically significant differential expression (adjusted  
 171 P-value < 0.01) are highlighted in blue (up-regulated) or red (down-regulated). The number of genes that correspond  
 172 to the up- and down-regulated transcripts are shown inside the boxes. c-d, Gene Ontology (GO) enrichment  
 173 analyses of biological processes for up- and down-regulated genes in *ctcf*<sup>-/-</sup> embryos at 24 (c) and 48 hpf (d). Terms  
 174 with a false discovery rate (FDR) < 0.05 are shown and considered as enriched. e, Number of differentially  
 175 expressed genes (DEGs) at 24 and 48 hpf showing (green) or not (grey) CTCF binding at their transcription start  
 176 sites (TSSs). f, Heatmaps showing CTCF ChIP-seq signal around the TSS of DEGs at 24 and 48 hpf.

177

## 178 **CTCF is required for chromatin accessibility at developmental CREs**

179 The expression of developmental genes is often regulated by multiple tissue-specific CREs,  
 180 on which combinations of transcription factors (TFs) are bound, giving rise to precise spatial  
 181 and temporal expression patterns. Since CTCF absence affects the expression of  
 182 developmental genes mostly without binding to their promoters, we reasoned that this could  
 183 be due to alterations in the function of their associated CREs. To test this, we performed ATAC-  
 184 seq in wild-type and *ctcf*<sup>-/-</sup> embryos at 24 and 48 hpf. At 24 hpf, we only found 56 differentially

185 accessible regions (DARs), 21 with increased (up-regulated) and 35 with decreased  
186 accessibility (down-regulated) (Fig. 3a). However, at 48 hpf we found a total of 18,744 DARs,  
187 most of them down-regulated (18,138 sites vs. 606 up-regulated) (Fig. 3b), temporally  
188 coinciding with the detected altered expression of developmental genes (Fig. 2b). Indeed,  
189 when we analyzed CREs gaining or losing accessibility in wild-type embryos from 24 to 48 hpf,  
190 we found that these sites failed to gain or lose accessibility in *ctcf*<sup>-/-</sup> embryos (Extended Data  
191 Fig. 5), indicating that loss of CTCF impacts chromatin accessibility of thousands of CREs.  
192 Motif enrichment analysis showed that the CTCF consensus binding sequence was specifically  
193 enriched in down-regulated peaks, both at 24 and 48 hpf (Fig. 3c-d). We confirmed this by  
194 analyzing CTCF binding to DARs at 48 hpf and found that 17.5% of up-regulated but 53.5% of  
195 down-regulated peaks were bound by CTCF (Fig. 3e). In contrast, up-regulated peaks were  
196 enriched for the p53 family motif at 48 hpf. At this stage we also found increased expression  
197 of *tp53* and well-known p53 target genes (Fig. 3d; Extended Data Fig. 6), pointing towards an  
198 increased apoptotic response in *ctcf*<sup>-/-</sup> mutants<sup>14</sup>. To test a possible contribution of p53 to the  
199 mutant phenotypes, we injected one-cell stage embryos with a morpholino to knock-down *tp53*  
200 expression. Despite reduced p53-target gene expression and loss of p53-target motif in  
201 morpholino-injected mutants, differential accessibility remained unaffected (Extended Data  
202 Fig. 6). Furthermore, the p53 knockdown did not change the mutant phenotype at 48 hpf,  
203 indicating that the phenotypic response is not driven by pro-apoptotic processes.

204 Next, we associated DARs to nearby DEGs and found that the average change in gene  
205 expression was consistent with the tendency of changes in chromatin accessibility and  
206 independent of CTCF binding (Fig. 3f). Interestingly, only down-regulated peaks without CTCF  
207 binding were associated with genes enriched in developmental functions, such as hindbrain  
208 development or heart formation (Fig. 3g). This indicates that loss of CTCF affects indirectly the  
209 accessibility of developmental CREs. We also noted that down-regulated ATAC peaks without  
210 CTCF binding sites were highly clustered within the regulatory landscapes of developmental  
211 genes, many of them strongly down-regulated in the mutant (Extended Data Fig. 7a-c). This is  
212 consistent with the view that developmental genes frequently locate within large gene deserts  
213 containing many CREs. Indeed, we found that TADs containing miss-regulated developmental  
214 genes were larger and had more associated CREs than those containing non-developmental  
215 genes (Fig. 3h-i). Several examples illustrate this tendency. The *sall1a* gene, encoding a  
216 transcriptional repressor involved in organogenesis, is in a TAD whose structure was lost in  
217 *ctcf*<sup>-/-</sup> embryos (Fig. 3j). The expression of *sall1a* was reduced in the absence of CTCF and  
218 several CREs exhibited reduced accessibility with most of them not binding CTCF. Other  
219 examples included the *lhx1a* and *sox11b* genes, both encoding developmental transcription

220 factors (Extended Data Fig. 7d-e). Altogether, these data show that CTCF is required for the  
 221 accessibility of thousands of CREs, many of which are associated with developmental genes.  
 222

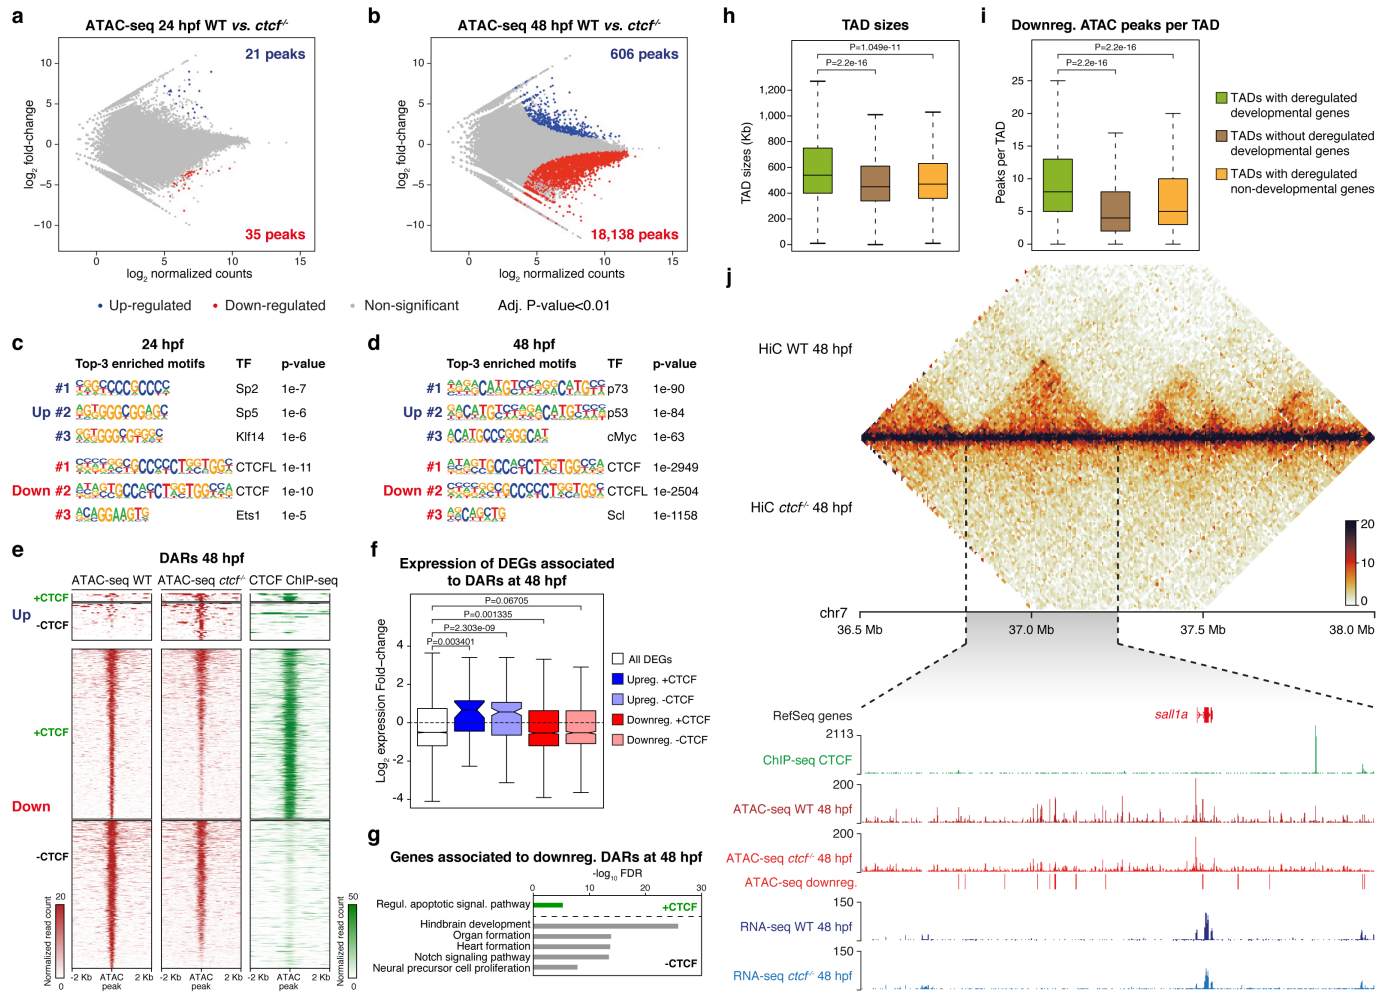

224 **Figure 3. CTCF promotes chromatin accessibility at developmental cis-regulatory elements.** a-b, Differential  
 225 analyses of chromatin accessibility between WT and *ctcf*<sup>-/-</sup> embryos at 24 (a) and 48 hpf (b) from ATAC-seq data  
 226 (n = 2 biological replicates per condition). The log<sub>2</sub> normalized read counts of WT ATAC peaks versus the log<sub>2</sub>  
 227 fold-change of accessibility are plotted. Regions showing a statistically significant differential accessibility (adjusted P-  
 228 value < 0.01) are highlighted in blue (up-regulated) or red (down-regulated). The number of peaks that correspond  
 229 to the up- and down-regulated sites are shown inside the boxes. c-d, Motif enrichment analyses for the up- and  
 230 down-regulated ATAC peaks in *ctcf*<sup>-/-</sup> embryos at 24 (c) and 48 hpf (d). The 3 motifs with the lowest p-values  
 231 are shown for each case. e, Heatmaps plotting normalized ATAC-seq signal in WT and *ctcf*<sup>-/-</sup> embryos at 48 hpf (red),  
 232 as well as CTCF ChIP-seq signal (green), for the differentially accessible regions (DARs) from (b) overlapping or  
 233 not with CTCF peaks. f, Box plots showing the expression fold-change in *ctcf*<sup>-/-</sup> embryos at 48 hpf of all DEGs or  
 234 only those associated with up-regulated or down-regulated DARs, overlapping or not with CTCF sites. Center line,  
 235 median; box limits, upper and lower quartiles; whiskers, 1.5x interquartile range; notches, 95% confidence interval  
 236 of the median. Statistical significance was assessed using the Wilcoxon's rank sum test. g, GO enrichment analyses  
 237 of biological processes for the genes associated with down-regulated DARs in *ctcf*<sup>-/-</sup> embryos at 48 hpf, overlapping  
 238 or not with CTCF sites. GO terms showing an FDR < 0.05 are considered as enriched. h-i, Box plots showing the  
 239 TAD sizes (h) and the number of down-regulated DARs per TAD (i) for TADs containing developmental miss-  
 240 regulated genes, TADs not containing developmental miss-regulated genes and TADs containing only non-  
 241 developmental miss-regulated genes. Center line, median; box limits, upper and lower quartiles; whiskers, 1.5x  
 242 interquartile range. Statistical significance was assessed using the Wilcoxon's rank sum test. j, Top, heatmaps  
 243 showing HiC signal in WT and *ctcf*<sup>-/-</sup> embryos at 48 hpf in a 1.5-Mb region of chromosome 7. Bottom, zoom within  
 244 the *sall1a* TAD showing UCSC Genome Browser tracks with CTCF ChIP-seq, ATAC-seq at 48 hpf in WT and *ctcf*  
 245 <sup>-/-</sup> embryos, ATAC-seq down-regulated peaks and RNA-seq at 48 hpf in WT and *ctcf*<sup>-/-</sup> embryos. The *sall1a* gene is  
 246 shown in red because it is down-regulated.



247

## 248 **CTCF is required for the spatiotemporal expression patterns of developmental genes**

249 We have shown so far that CTCF is not only required for chromosome folding during zebrafish  
250 development, but also for the robust expression levels of many developmental genes and  
251 chromatin accessibility at their regulatory landscapes. To better assess gene miss-expression  
252 in relation to the loss of chromatin structure, we first investigated chromatin interactions at the  
253 enhancer-promoter level with high resolution by performing UMI-4C experiments. We used  
254 developmental gene promoters as viewpoints to analyze their regulatory landscapes in wild-  
255 type and *ctcf*<sup>-/-</sup> embryos at 48 hpf, such as the *ptch2* promoter. *Ptch2* is a patterning gene that  
256 encodes a cell receptor binding the Shh morphogen and whose expression was detected as  
257 up-regulated by RNA-seq in *ctcf*<sup>-/-</sup> mutants (Fig. 4a). We found that contacts from the *ptch2*  
258 promoter spanned a region of about 500 kb in wild-type embryos, establishing contacts with  
259 many genomic regions that included ATAC peaks (potential CREs) with and without CTCF  
260 binding (Fig. 4a). However, the *ptch2* regulatory landscape was drastically reduced in *ctcf*<sup>-/-</sup>  
261 embryos. The interaction profile was generally characterized by a loss of long-range contacts  
262 but retaining some contacts at shorter ranges (Fig. 4a), consistent with observations in  
263 mammalian cells<sup>32,44</sup>. Genomic regions showing a reduced contact frequency with the *ptch2*  
264 promoter included CTCF-binding sites as well as ATAC peaks with reduced accessibility in the  
265 mutant and others not affected by CTCF absence. These results indicate that enhancer-  
266 promoter contacts were severely affected by the absence of CTCF, and in particular, long-  
267 range interactions.

268 Next, we investigated whether this loss of contacts altered the expression pattern of  
269 *ptch2* by performing whole-embryo *in situ* hybridization. *Ptch2* mRNA was detected in the  
270 brain, pharyngeal arches and pectoral fin buds of wild-type embryos, but we found that this  
271 pattern was severely altered in *ctcf*<sup>-/-</sup> embryos (Fig. 4b). Consistent with the upregulation in our  
272 bulk RNA-seq data, *ptch2* expression in mutant embryos was extended to broader regions of  
273 the brain, pharyngeal arches, neural tube and a prominent expansion of expression was  
274 observed in the somites; however, expression in the pectoral fin buds was lost (Fig. 4b),  
275 illustrating the limitation of bulk RNA-seq to detect complex changes in gene expression  
276 patterns. Consistently, a similar effect was found for expression of *shha* in the pectoral fin buds  
277 (Fig. 4b). These results indicate that loss of CTCF and promoter contacts alters the expression  
278 patterns of developmental genes, including loss and gain of expression domains, likely  
279 disrupting developmental programs. Similar changes in the chromatin interactions of regulatory  
280 landscapes and gene expression patterns were observed at the *HoxD* cluster. Viewpoints from  
281 the promoters of *hoxd4a* and *hoxd13a* showed reduced interactions within their regulatory

282 landscapes in *ctcf*<sup>-/-</sup> embryos, especially long-range contacts (Extended Data Fig. 8a).  
 283 Although we could not detect mis-regulation of *hoxd4a* and *hoxd13a* by RNA-seq, *in situ*  
 284 hybridization experiments showed a clear reduction of their expression levels (Extended Data  
 285 Fig. 8b). However, other *hox* genes showed consistent mis-regulation detected by both  
 286 techniques (Extended Data Fig. 8c). Altogether, our data indicate that CTCF is required to  
 287 establish chromatin contacts of gene promoters with their associated regulatory landscape and  
 288 to ensure the accurate spatiotemporal expression patterns of developmental genes.

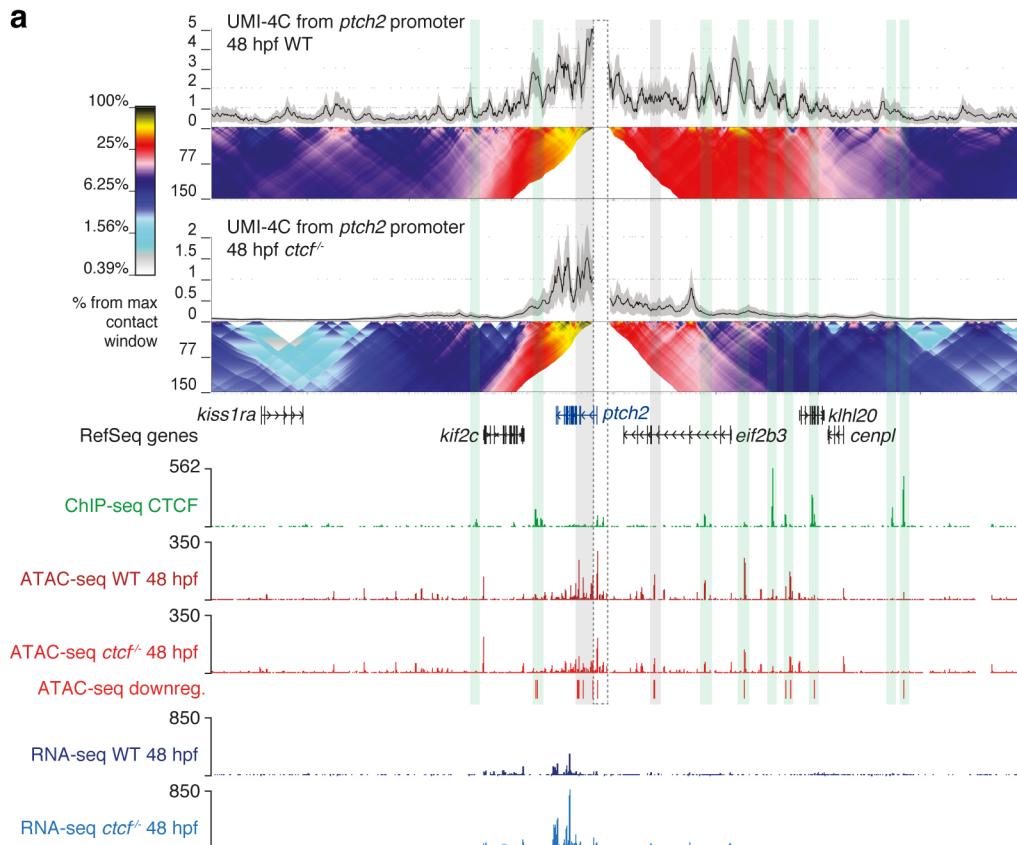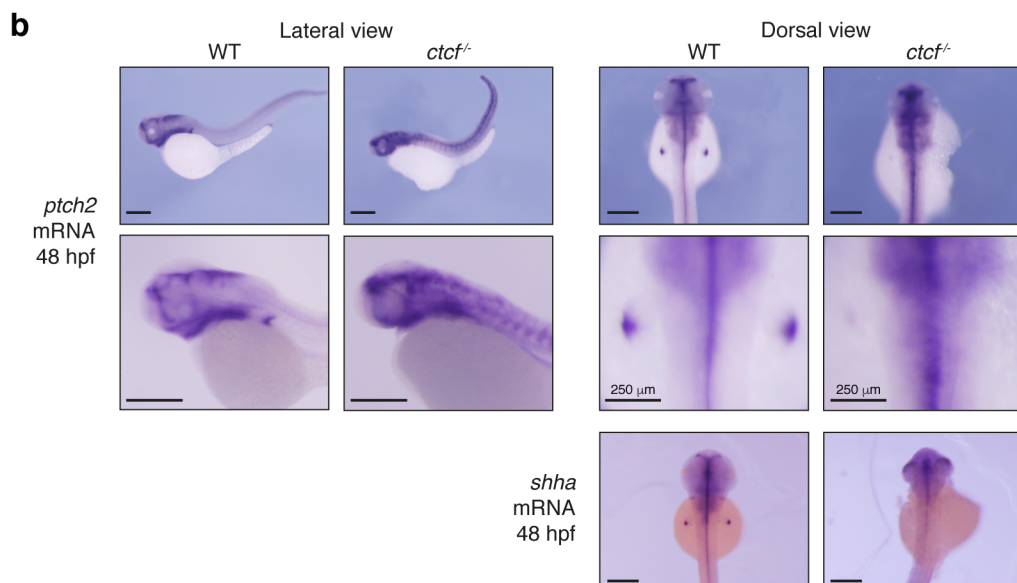

289

290 **Figure 4. CTCF is required to sustain the regulatory landscapes and complex expression patterns of**  
291 **developmental genes.** **a**, Top, UMI-4C assays in WT and *ctcf*<sup>-/-</sup> embryos at 48 hpf using the *ptch2* gene promoter  
292 as a viewpoint. Black lines and grey shadows represent the average normalized UMI counts and their standard  
293 deviation, respectively. Domainograms below UMI counts represent contact frequency between pairs of genomic  
294 regions. Bottom, UCSC Genome Browser tracks with CTCF ChIP-seq, ATAC-seq at 48 hpf in WT and *ctcf*<sup>-/-</sup>  
295 embryos, ATAC-seq down-regulated peaks and RNA-seq at 48 hpf in WT and *ctcf*<sup>-/-</sup> embryos. The *ptch2* gene is  
296 shown in blue because it is up-regulated. A dotted-line square represents the restriction fragment containing the  
297 *ptch2* gene promoter that is used as a viewpoint; green shadows highlight CTCF sites and grey shadows highlight  
298 down-regulated ATAC-peaks without CTCF binding. **b**, Whole-mount *in situ* hybridization of the *ptch2* and *shha*  
299 genes in WT and *ctcf*<sup>-/-</sup> embryos at 48 hpf. Left, lateral view; right, dorsal view. Scale bars represent 500  $\mu$ m, unless  
300 indicated.

301

## 302 Discussion

303 In this work, we have established a new *in vivo* model to study the loss of CTCF in zebrafish  
304 and demonstrate that chromatin structure is required to maintain developmental gene  
305 regulatory landscapes during body plan formation. In the last years, the function of CTCF in  
306 chromosome folding has been clearly demonstrated in mammalian *in vitro* systems, including  
307 mouse embryonic stem cells, neural progenitor cells as well as human morula embryos<sup>5,15,32</sup>.  
308 These studies showed by different depletion mechanisms that CTCF knock-down severely  
309 reduces TAD formation and insulation. Accordingly, we show here that CTCF is also required  
310 for chromatin structure in zebrafish embryos (Fig. 1), extending these conclusions to  
311 vertebrates and in agreement with a recent report showing that CTCF knockdown in *Xenopus*  
312 embryos altered chromatin structure<sup>41</sup>.

313 Despite this well-known function of CTCF, its requirement for the regulation of gene  
314 expression has remained controversial. The studies mentioned above showed modest effects  
315 of CTCF depletion in gene expression, suggesting that steady-state transcription is mostly  
316 resistant to genome-wide alteration of chromatin structure. This contrasts with the observation  
317 that CTCF is essential for embryonic development<sup>14</sup>, but suggests that CTCF-mediated  
318 chromatin structure could be essential for processes in which cells respond to multiple signals  
319 and where transcriptional control is highly dynamic. However, the early embryonic lethality of  
320 CTCF knockout in animal models, has impeded the analysis of CTCF function for  
321 transcriptional regulation beyond pluripotency. Our *ctcf* mutant zebrafish model overcame this  
322 limitation due to the prolonged maternal contribution that lasts, at least, until gastrulation. This  
323 allows *ctcf*<sup>-/-</sup> embryos to develop until stages in which patterning and organogenesis take place.  
324 Using this model, we observe for the first time in developing embryos the miss-regulation of  
325 thousands of genes (Fig. 2), among which many lineage-specific genes that are dynamically  
326 regulated during development. These observations are consistent with recent reports, showing  
327 that CTCF is required for the expression of a subset of lineage-specific genes during cell  
328 differentiation<sup>32</sup> and for fast transcriptional responses to external stimuli<sup>45</sup>.

329 The expression of developmental genes is characterized by a tight spatiotemporal  
330 control by CREs that constitute their regulatory landscapes. These have been shown to largely  
331 coincide with TADs and to be constrained by TAD boundaries<sup>46</sup>. Here, we show that chromatin  
332 accessibility at CTCF sites but also at thousands of CREs is compromised in *ctcf* mutants (Fig.  
333 3). Specifically, clusters of CREs within large TADs of developmental genes show highly  
334 reduced accessibility, most of them without direct CTCF binding, suggesting an indirect effect  
335 due to the loss of chromatin structure. This may arise because of reduced TF accumulation at  
336 CREs either due to their decreased expression levels or decreased enhancer-promoter  
337 interactions. High-resolution analyses of the *ptch2*, *hoxd4a* and *hoxd13a* gene regulatory  
338 landscapes show that CREs with reduced accessibility lose contacts with their promoters,  
339 mainly long-range and many of them without CTCF binding (Fig. 4 and Extended Data Fig. 8).  
340 While it is unlikely that CTCF directly mediates those enhancer-promoter interactions, it may  
341 favor their establishment by promoting contacts within the involved TADs. This is in agreement  
342 with recent observations showing that CTCF is required for long-range enhancer-promoter  
343 contacts<sup>32,44</sup>. Consequently, the complex expression patterns of these genes are altered in a  
344 tissue-specific manner, showing up- and down-regulation in different embryonic domains (Fig.  
345 4). This whole-embryo *in situ* hybridization approach allows the detection of transcriptional  
346 alterations not detected by bulk RNA-seq, highlighting the potential of using animal models  
347 *versus in vitro* systems.

348 In summary, our data demonstrate that CTCF is essential to sustain large regulatory  
349 landscapes of developmental genes during embryonic development. This would favor the  
350 proper interaction of multiple CREs with their target genes, leading to the complex  
351 spatiotemporal expression patterns of developmental genes. It has been suggested that TADs  
352 may have evolved as conserved scaffolds for developmental gene regulatory landscapes<sup>47</sup>.  
353 Our observations support this view by linking chromatin structure at regulatory landscapes with  
354 gene function.

355

## 356 References

- 357 1 Bell, A. C., West, A. G. & Felsenfeld, G. The protein CTCF is required for the  
358 enhancer blocking activity of vertebrate insulators. *Cell* **98**, 387-396,  
359 doi:10.1016/s0092-8674(00)81967-4 (1999).
- 360 2 Filippova, G. N. *et al.* An exceptionally conserved transcriptional repressor, CTCF,  
361 employs different combinations of zinc fingers to bind diverged promoter sequences  
362 of avian and mammalian c-myc oncogenes. *Mol Cell Biol* **16**, 2802-2813,  
363 doi:10.1128/mcb.16.6.2802 (1996).
- 364 3 Merckenschlager, M. & Nora, E. P. CTCF and Cohesin in Genome Folding and  
365 Transcriptional Gene Regulation. *Annu Rev Genomics Hum Genet* **17**, 17-43,  
366 doi:10.1146/annurev-genom-083115-022339 (2016).

- 367 4 Phillips, J. E. & Corces, V. G. CTCF: master weaver of the genome. *Cell* **137**, 1194-  
368 1211, doi:10.1016/j.cell.2009.06.001 (2009).
- 369 5 Nora, E. P. *et al.* Targeted Degradation of CTCF Decouples Local Insulation of  
370 Chromosome Domains from Genomic Compartmentalization. *Cell* **169**, 930-944  
371 e922, doi:10.1016/j.cell.2017.05.004 (2017).
- 372 6 Dixon, J. R. *et al.* Topological domains in mammalian genomes identified by analysis  
373 of chromatin interactions. *Nature* **485**, 376-380, doi:10.1038/nature11082 (2012).
- 374 7 Hou, C., Li, L., Qin, Z. S. & Corces, V. G. Gene density, transcription, and insulators  
375 contribute to the partition of the Drosophila genome into physical domains. *Mol Cell*  
376 **48**, 471-484, doi:10.1016/j.molcel.2012.08.031 (2012).
- 377 8 Nora, E. P. *et al.* Spatial partitioning of the regulatory landscape of the X-inactivation  
378 centre. *Nature* **485**, 381-385, doi:10.1038/nature11049 (2012).
- 379 9 Sexton, T. *et al.* Three-dimensional folding and functional organization principles of  
380 the Drosophila genome. *Cell* **148**, 458-472, doi:10.1016/j.cell.2012.01.010 (2012).
- 381 10 Rao, S. S. *et al.* A 3D map of the human genome at kilobase resolution reveals  
382 principles of chromatin looping. *Cell* **159**, 1665-1680, doi:10.1016/j.cell.2014.11.021  
383 (2014).
- 384 11 Splinter, E. *et al.* CTCF mediates long-range chromatin looping and local histone  
385 modification in the beta-globin locus. *Genes Dev* **20**, 2349-2354,  
386 doi:10.1101/gad.399506 (2006).
- 387 12 Phillips-Cremins, J. E. *et al.* Architectural protein subclasses shape 3D organization  
388 of genomes during lineage commitment. *Cell* **153**, 1281-1295,  
389 doi:10.1016/j.cell.2013.04.053 (2013).
- 390 13 Heath, H. *et al.* CTCF regulates cell cycle progression of alphabeta T cells in the  
391 thymus. *EMBO J* **27**, 2839-2850, doi:10.1038/emboj.2008.214 (2008).
- 392 14 Moore, J. M. *et al.* Loss of maternal CTCF is associated with peri-implantation  
393 lethality of Ctcf null embryos. *PLoS One* **7**, e34915,  
394 doi:10.1371/journal.pone.0034915 (2012).
- 395 15 Chen, X. *et al.* Key role for CTCF in establishing chromatin structure in human  
396 embryos. *Nature* **576**, 306-310, doi:10.1038/s41586-019-1812-0 (2019).
- 397 16 de Laat, W. & Duboule, D. Topology of mammalian developmental enhancers and  
398 their regulatory landscapes. *Nature* **502**, 499-506, doi:10.1038/nature12753 (2013).
- 399 17 Furlong, E. E. M. & Levine, M. Developmental enhancers and chromosome topology.  
400 *Science* **361**, 1341-1345, doi:10.1126/science.aau0320 (2018).
- 401 18 Franke, M. & Gomez-Skarmeta, J. L. An evolutionary perspective of regulatory  
402 landscape dynamics in development and disease. *Curr Opin Cell Biol* **55**, 24-29,  
403 doi:10.1016/j.ceb.2018.06.009 (2018).
- 404 19 Bonev, B. & Cavalli, G. Organization and function of the 3D genome. *Nat Rev Genet*  
405 **17**, 661-678, doi:10.1038/nrg.2016.112 (2016).
- 406 20 Dekker, J. & Mirny, L. The 3D Genome as Moderator of Chromosomal  
407 Communication. *Cell* **164**, 1110-1121, doi:10.1016/j.cell.2016.02.007 (2016).
- 408 21 Dixon, J. R., Gorkin, D. U. & Ren, B. Chromatin Domains: The Unit of Chromosome  
409 Organization. *Mol Cell* **62**, 668-680, doi:10.1016/j.molcel.2016.05.018 (2016).
- 410 22 McCord, R. P., Kaplan, N. & Giorgetti, L. Chromosome Conformation Capture and  
411 Beyond: Toward an Integrative View of Chromosome Structure and Function. *Mol*  
412 *Cell* **77**, 688-708, doi:10.1016/j.molcel.2019.12.021 (2020).
- 413 23 Rowley, M. J. & Corces, V. G. Organizational principles of 3D genome architecture.  
414 *Nat Rev Genet* **19**, 789-800, doi:10.1038/s41576-018-0060-8 (2018).
- 415 24 Fudenberg, G. *et al.* Formation of Chromosomal Domains by Loop Extrusion. *Cell*  
416 *Rep* **15**, 2038-2049, doi:10.1016/j.celrep.2016.04.085 (2016).
- 417 25 Sanborn, A. L. *et al.* Chromatin extrusion explains key features of loop and domain  
418 formation in wild-type and engineered genomes. *Proc Natl Acad Sci U S A* **112**,  
419 E6456-6465, doi:10.1073/pnas.1518552112 (2015).



- 420 26 Rao, S. S. P. *et al.* Cohesin Loss Eliminates All Loop Domains. *Cell* **171**, 305-320  
421 e324, doi:10.1016/j.cell.2017.09.026 (2017).
- 422 27 Franke, M. *et al.* Formation of new chromatin domains determines pathogenicity of  
423 genomic duplications. *Nature* **538**, 265-269, doi:10.1038/nature19800 (2016).
- 424 28 Laugsch, M. *et al.* Modeling the Pathological Long-Range Regulatory Effects of  
425 Human Structural Variation with Patient-Specific hiPSCs. *Cell Stem Cell* **24**, 736-752  
426 e712, doi:10.1016/j.stem.2019.03.004 (2019).
- 427 29 Lupianez, D. G. *et al.* Disruptions of topological chromatin domains cause pathogenic  
428 rewiring of gene-enhancer interactions. *Cell* **161**, 1012-1025,  
429 doi:10.1016/j.cell.2015.04.004 (2015).
- 430 30 Spielmann, M., Lupianez, D. G. & Mundlos, S. Structural variation in the 3D genome.  
431 *Nat Rev Genet* **19**, 453-467, doi:10.1038/s41576-018-0007-0 (2018).
- 432 31 Symmons, O. *et al.* The Shh Topological Domain Facilitates the Action of Remote  
433 Enhancers by Reducing the Effects of Genomic Distances. *Dev Cell* **39**, 529-543,  
434 doi:10.1016/j.devcel.2016.10.015 (2016).
- 435 32 Kubo, N. *et al.* CTCF Promotes Long-range Enhancer-promoter Interactions and  
436 Lineage-specific Gene Expression in Mammalian Cells. *bioRxiv*,  
437 2020.2003.2021.001693, doi:10.1101/2020.03.21.001693 (2020).
- 438 33 Ghavi-Helm, Y. *et al.* Highly rearranged chromosomes reveal uncoupling between  
439 genome topology and gene expression. *Nat Genet* **51**, 1272-1282,  
440 doi:10.1038/s41588-019-0462-3 (2019).
- 441 34 Williamson, I. *et al.* Developmentally regulated Shh expression is robust to TAD  
442 perturbations. *Development* **146**, doi:10.1242/dev.179523 (2019).
- 443 35 Despang, A. *et al.* Functional dissection of the Sox9-Kcnj2 locus identifies  
444 nonessential and instructive roles of TAD architecture. *Nat Genet* **51**, 1263-1271,  
445 doi:10.1038/s41588-019-0466-z (2019).
- 446 36 Hnisz, D. *et al.* Activation of proto-oncogenes by disruption of chromosome  
447 neighborhoods. *Science* **351**, 1454-1458, doi:10.1126/science.aad9024 (2016).
- 448 37 Paliou, C. *et al.* Prefomed chromatin topology assists transcriptional robustness of  
449 Shh during limb development. *Proc Natl Acad Sci U S A* **116**, 12390-12399,  
450 doi:10.1073/pnas.1900672116 (2019).
- 451 38 Vejnar, C. E. *et al.* Genome wide analysis of 3' UTR sequence elements and proteins  
452 regulating mRNA stability during maternal-to-zygotic transition in zebrafish. *Genome*  
453 *Res* **29**, 1100-1114, doi:10.1101/gr.245159.118 (2019).
- 454 39 Kaaij, L. J. T., van der Weide, R. H., Ketting, R. F. & de Wit, E. Systemic Loss and  
455 Gain of Chromatin Architecture throughout Zebrafish Development. *Cell Rep* **24**, 1-10  
456 e14, doi:10.1016/j.celrep.2018.06.003 (2018).
- 457 40 Crane, E. *et al.* Condensin-driven remodelling of X chromosome topology during  
458 dosage compensation. *Nature* **523**, 240-244, doi:10.1038/nature14450 (2015).
- 459 41 Niu, L. *et al.* Systematic Chromatin Architecture Analysis in *Xenopus*  
460 *tropicalis* Reveals Conserved Three-Dimensional Folding Principles of  
461 Vertebrate Genomes. *bioRxiv*, 2020.2004.2002.021378,  
462 doi:10.1101/2020.04.02.021378 (2020).
- 463 42 de Wit, E. *et al.* CTCF Binding Polarity Determines Chromatin Looping. *Mol Cell* **60**,  
464 676-684, doi:10.1016/j.molcel.2015.09.023 (2015).
- 465 43 Gomez-Marin, C. *et al.* Evolutionary comparison reveals that diverging CTCF sites  
466 are signatures of ancestral topological associating domains borders. *Proc Natl Acad*  
467 *Sci U S A* **112**, 7542-7547, doi:10.1073/pnas.1505463112 (2015).
- 468 44 Thiecke, M. J. *et al.* Cohesin-dependent and independent mechanisms support  
469 chromosomal contacts between promoters and enhancers. *bioRxiv*,  
470 2020.2002.2010.941989, doi:10.1101/2020.02.10.941989 (2020).
- 471 45 Stik, G. *et al.* CTCF is dispensable for immune cell transdifferentiation but facilitates  
472 an acute inflammatory response. *Nat Genet*, doi:10.1038/s41588-020-0643-0 (2020).

- 473 46 Harmston, N. *et al.* Topologically associating domains are ancient features that  
474 coincide with Metazoan clusters of extreme noncoding conservation. *Nat Commun* **8**,  
475 441, doi:10.1038/s41467-017-00524-5 (2017).  
476 47 Acemel, R. D., Maeso, I. & Gomez-Skarmeta, J. L. Topologically associated domains:  
477 a successful scaffold for the evolution of gene regulation in animals. *Wiley Interdiscip*  
478 *Rev Dev Biol* **6**, doi:10.1002/wdev.265 (2017).  
479

## 480 **Methods**

481

### 482 **Animal experimentation**

483 Wild-type AB/Tübingen zebrafish strains were maintained and bred under standard conditions.  
484 All experiments involving animals conform national and European Community standards for  
485 the use of animals in experimentation and were approved by the Ethical Committees from the  
486 University Pablo de Olavide, CSIC and the Andalusian government.

487

### 488 **CRISPR-Cas9 genome editing**

489 CRISPR target sites to mutate the *ctcf* gene were identified using the CRISPRscan online  
490 tool<sup>48</sup>. Two single guide RNAs (sgRNAs) targeting the exons 4 and 5 of the *ctcf* gene were  
491 used with the following target sequences: 5'-GGA GTT ACA CTT GCC CAC GC-3' and 5'-  
492 GGC ATG GCC TTT GTC ACC AG-3'. The template DNA for sgRNA transcription was  
493 generated by PCR using CTCFexon4, CTCFexon5 and sgRNA\_universal primers ([Extended](#)  
494 [Data Table 1](#)) and Phusion DNA polymerase (Thermo Fisher Scientific). sgRNAs were *in vitro*  
495 transcribed using the HiScribe T7 Quick High Yield RNA synthesis kit (NEB) using 75 ng of  
496 template, treated with DNase I (NEB) and purified using the RNA Clean and Concentrator kit  
497 (Zymo Research).

498 One-cell stage zebrafish embryos were injected with 2-3 nl of a solution containing 140  
499 ng/ $\mu$ l of Cas9 mRNA and 25 ng/ $\mu$ l of each sgRNA. The CRISPR-Cas9 approach generated a  
500 deletion of 260 bp encompassing exons 4 and 5 and resulting in a premature STOP codon in  
501 exon 5. The predicted truncated protein had 343 amino acids instead of 798, lacking ten and  
502 a half of the eleven zinc finger domains of the CTCF protein. For genotyping, genomic DNA  
503 was obtained by incubating the samples (whole embryos or adult caudal fin fragments) in TE  
504 buffer supplemented with 5% Chelex-100 (BioRad) and 10  $\mu$ g/ml Proteinase K (Roche) for 1h  
505 (embryos) or 4h (fins) at 55°C and 10 min at 95°C, and then stored at 4°C. One microliter of  
506 the supernatant was used as a template for standard 20  $\mu$ l PCR reactions using CTCFpF and  
507 CTCFpR primers ([Extended Data Table 1](#)), resulting in 842- or 582-bp amplicons for wild type  
508 or mutant alleles, respectively. The mutant allele was stably maintained in heterozygosis with  
509 no apparent phenotypes but homozygous mutants are embryonic lethal (<3 days).

510

### 511 **Whole-mount embryo immunofluorescence**

512 For immunofluorescence, embryos were fixed overnight at 4°C with 4% paraformaldehyde,  
513 washed in PBT (PBS supplemented with 0.2% Triton-X100) and blocked in this solution with  
514 2% goat serum and 2 mg/ml BSA for 1 h at RT. Then, they were incubated overnight at 4°C

515 with primary antibody specific for zebrafish CTCF<sup>49</sup> (used in 1:500 dilution). After extensive  
516 washings with PBT, embryos were incubated overnight at 4°C with goat anti-rabbit Alexa Fluor  
517 488 secondary antibody (used 1:800 dilution, A27034 Invitrogen). Finally, embryos were flat-  
518 mounted and imaged under an SP confocal microscope (Leica).

519

#### 520 **Whole-mount embryo *in situ* hybridization**

521 Antisense RNA probes were prepared from cDNA using digoxigenin (Boehringer Mannheim)  
522 as label and the primers listed in [Extended Data Table 1](#), except those for *shha* and *hoxd13a*  
523 that were previously described<sup>50</sup>. Zebrafish embryos were prepared, hybridized and stained  
524 using standard protocols<sup>51</sup>. Embryos at 48 hpf stage were fixed in 4% paraformaldehyde  
525 overnight, dehydrated in methanol and stored at -20°C. All solutions and reagents used were  
526 RNase-free. The embryos were hydrated using decreasing amounts of methanol and finally in  
527 PBS-0.1% Tween. Then, they were treated with 10 µg/ml proteinase K for 10 min at room  
528 temperature and gently washed with PBS-0.1% Tween. In the pre-hybridization step, embryos  
529 were kept at 70°C in the hybridization buffer for at least 1 hour. Then, the probe was diluted to  
530 2 ng/µl in hybridization buffer and incubated overnight at 70°C while moving. Pre-heated  
531 buffers with decreasing amounts of hybridization buffer (75%, 50%, 25% and 0%) in 2x SSC  
532 solution were used to wash embryos for 10 min, plus a 30 min wash at 70°C with 0.05x SSC.  
533 Then, they were incubated with Blocking Buffer (PBS-0.1% Tween, 2% normal goat serum, 2  
534 mg/ml bovine serum albumin [BSA]) for 1 hour, and with an anti-digoxigenin antibody (1:5,000  
535 in Blocking Buffer) for at least 2 hours at room temperature. After this, embryos were washed  
536 six times with PBS-0.1% Tween at room temperature and then overnight at 4°C. Next day,  
537 embryos were washed once more with PBS-0.1% Tween and three times with fresh AP buffer  
538 (100 mM Tris-HCl pH 9.5, 50mM MgCl<sub>2</sub>, 100mM NaCl, 0.1% Tween), followed by signal  
539 development with NBT/BCIP solution (225 µg/ml NBT, 175 µg/ml BCIP) in multi-well plates in  
540 the dark. Signal development was stopped by washing with PBS-0.1% Tween and fixing with  
541 4% paraformaldehyde. Imaging of the *in situ* hybridization signal was performed in MZ-12  
542 dissecting scope (Leica).

543

#### 544 **RNA-seq**

545 For total RNA extraction, wild-type and *ctcf*<sup>-/-</sup> single embryos at 24 or 48 hpf were collected,  
546 manually de-chorionated and suspended in TRIsure (Bioline) with chloroform. DNA was used  
547 for genotyping and single wild-type and *ctcf*<sup>-/-</sup> individuals were selected for RNA-seq  
548 experiments. Precipitated RNA was then treated with TURBO DNA free kit (Invitrogen). Two  
549 biological replicates were used for each analyzed genotype and stage.

550 Illumina libraries were constructed and sequenced in a BGISEQ-500 single-end lane  
551 producing around 50 million (M) of 50-bp reads. Reads were aligned to the GRCz10  
552 (danRer10) zebrafish genome assembly using STAR 2.5.3a<sup>52</sup> and counted using the htseq-  
553 count tool from the HTSeq 0.8.0 toolkit<sup>53</sup>. Differential gene expression analysis was performed  
554 using the DESeq2 1.18.1 package in R 3.4.3<sup>54</sup>, setting a corrected P value < 0.01 as the cutoff  
555 for statistical significance of the differential expression. Enrichment of GO Biological Process  
556 terms was calculated using David<sup>55</sup>, with a false discovery rate (FDR)-corrected P value < 0.05  
557 as statistical cutoff.

558

### 559 **ATAC-seq**

560 ATAC-seq assays were performed using standard protocols<sup>56,57</sup>, with minor modifications.  
561 Briefly, single WT or *ctcf*<sup>-/-</sup> mutant embryos at 24 or 48 hpf coming from *ctcf*<sup>+/-</sup> crosses were  
562 manually de-chorionated. Yolk was dissolved with Ginzburg Ring Finger (55 mM NaCl, 1.8 mM  
563 KCl, 1.15 mM NaHCO<sub>3</sub>) by pipetting and shaking 5 min at 1100 rpm. Deyolked embryos were  
564 collected by centrifugation for 5 min at 500g 4°C. Supernatant was removed and embryos  
565 washed with PBS. Then, embryos were lysed in 50  $\mu$ l of Lysis Buffer (10 mM Tris-HCl pH 7.4,  
566 10 mM NaCl, 3 mM MgCl<sub>2</sub>, 0.1% NP-40, 1x Roche Complete protease inhibitors cocktail) by  
567 pipetting up and down. The whole cell lysate was used for TAGmentation, which were  
568 centrifuged for 10 min at 500g 4°C and resuspended in 50  $\mu$ l of the Transposition Reaction,  
569 containing 1.25  $\mu$ l of Tn5 enzyme and TAGmentation Buffer (10 mM Tris-HCl pH 8.0, 5 mM  
570 MgCl<sub>2</sub>, 10 % w/v dimethylformamide), and incubated for 30 min at 37°C. Immediately after  
571 TAGmentation, DNA was purified using the Minelute PCR Purification Kit (Qiagen) and eluted  
572 in 20  $\mu$ l. Before library amplification, purified DNA was used to genotype 24-hpf embryos (see  
573 above) and wild-type or *ctcf*<sup>-/-</sup> mutants were selected for deep sequencing. Libraries were  
574 generated by PCR amplification using NEBNext High-Fidelity 2X PCR Master Mix (NEB). The  
575 resulting libraries were multiplexed and sequenced in a HiSeq 4000 pair-end lane producing  
576 100M of 49-bp pair end reads per sample.

577

### 578 **ChIPmentation**

579 ChIP-seq of CTCF was performed by ChIPmentation, which incorporates Tn5-mediated  
580 TAGmentation of immunoprecipitated DNA, as previously described<sup>58,59</sup>. Briefly, 100 zebrafish  
581 embryos at 24 hpf were dechorionated with 300  $\mu$ g/ml pronase, fixed for 10 min in 1%  
582 paraformaldehyde (in 200 mM phosphate buffer) at room temperature, quenched for 5 min  
583 with 0.125 M glycine, washed in PBS and frozen at -80°C. Fixed embryos were homogenized  
584 in 2 ml cell lysis buffer (10 mM Tris-HCl pH 7.5, 10 mM NaCl, 0.3% NP-40, 1x Roche Complete



585 protease inhibitors cocktail) with a Dounce Homogenizer on ice and centrifuged 5 min 2,300g  
586 at 4°C. Pelleted nuclei were resuspended in 333  $\mu$ l of nuclear lysis buffer (50 mM Tris-HCl pH  
587 7.5, 10 mM EDTA, 1% SDS, 1x Roche Complete protease inhibitors cocktail), kept 5 min on  
588 ice and diluted with 667  $\mu$ l of ChIP dilution buffer (16.7 mM Tris-HCl pH 7.5, 1.2 mM EDTA,  
589 167 mM NaCl, 0.01% SDS, 1.1% Triton-X100). Then, chromatin was sonicated in a Covaris  
590 M220 sonicator (duty cycle 10%, PIP 75W, 100 cycles/burst, 10 min) and centrifuged 5 min  
591 18,000g at 4°C. The recovered supernatant, which contained soluble chromatin, was used for  
592 ChIP or frozen at -80°C after checking the size of the sonicated chromatin. Four 250  $\mu$ l aliquots  
593 of sonicated chromatin were used for each independent ChIP experiment, and each aliquot  
594 incubated with 2  $\mu$ g of anti-CTCF antibody<sup>49</sup> and rotated overnight at 4°C. Next day, 20  $\mu$ l of  
595 protein G Dynabeads (Invitrogen) per aliquot were washed twice with ChIP dilution buffer and  
596 resuspended in 50  $\mu$ l/aliquot of the same solution. Immunoprecipitated chromatin was then  
597 incubated with washed beads for 1 hour rotating at 4°C and washed twice sequentially with  
598 wash buffer 1 (20 mM Tris-HCl pH 7.5, 2 mM EDTA, 150 mM NaCl, 1% SDS, 1% Triton-X100),  
599 wash buffer 2 (20 mM Tris-HCl pH 7.5, 2 mM EDTA, 500 mM NaCl, 0.1% SDS, 1% Triton-  
600 X100), wash buffer 3 (10 mM Tris-HCl pH 7.5, 1 mM EDTA, 250 mM LiCl, 1% NP-40, 1% Na-  
601 deoxycholate) and 10 mM Tris-HCl pH 8.0, using a cold magnet (Invitrogen). Then, beads were  
602 resuspended in 25  $\mu$ l of TAGmentation reaction mix (10 mM Tris-HCl pH 8.0, 5 mM MgCl<sub>2</sub>, 10  
603 % w/v dimethylformamide), added 1  $\mu$ l of Tn5 enzyme and incubated 1 min at 37°C.  
604 TAGmentation reaction was put in the cold magnet and the supernatant discarded. Beads were  
605 washed twice again with wash buffer 1 and 1x TE and eluted twice for 15 min in 100  $\mu$ l of  
606 elution buffer (50 mM NaHCO<sub>3</sub> pH 8.8, 1% SDS). The 200  $\mu$ l of eluted chromatin per aliquot  
607 were then decrosslinked by adding 10  $\mu$ l of 4M NaCl and 1  $\mu$ l of 10 mg/ml proteinase K and  
608 incubating at 65°C for 6 hours. DNA was purified using Minelute PCR Purification Kit (Qiagen),  
609 pooling all aliquots in a single column, and eluted in 20  $\mu$ l. Library preparation was  
610 performed as previously described for ATAC-seq (see above). Libraries were multiplexed and  
611 sequenced in a HiSeq 4000 pair-end lane producing around 20M of 49-bp paired-end reads  
612 per sample.

613

#### 614 **ChIPmentation and ATAC-seq data analyses**

615 ChIPmentation and ATAC-seq reads were aligned to the GRCz10 (danRer10) zebrafish  
616 genome assembly using Bowtie2<sup>60</sup> and those pairs separated by more than 2 Kb were  
617 removed. For ATAC-seq, the Tn5 cutting site was determined as the position -4 (minus strand)  
618 or +5 (plus strand) from each read start, and this position was extended 5 bp in both directions.  
619 Conversion of SAM alignment files to BAM was performed using Samtools<sup>61</sup>. Conversion of

620 BAM to BED files, and peak analyses, such as overlaps or merges, were carried out using the  
621 Bedtools suite<sup>62</sup>. Conversion of BED to BigWig files was performed using the genomecov tool  
622 from Bedtools and the wigToBigWig utility from UCSC<sup>63</sup>. For ATAC-seq, peaks were called  
623 using MACS2 algorithm<sup>64</sup> with an FDR < 0.05 for each replicate and merged in a single pool  
624 of peaks that was used to calculate differentially accessible sites with DESeq2 1.18.1 package  
625 in R 3.4.3<sup>54</sup>, setting a corrected P value < 0.01 as the cutoff for statistical significance of the  
626 differential accessibility. For ChIPmentation, peaks with an FDR < 0.001 were called with  
627 MACS2. For visualization purposes, reads were extended 100 bp for ATAC-seq and 300 bp  
628 for ChIPmentation. For data comparison, all ATAC-seq experiments used were normalized  
629 using reads falling into peaks to counteract differences in background levels between  
630 experiments and replicates, as previously described<sup>58</sup>.

631 Heatmaps and average profiles of ChIPmentation and ATAC-seq data were generated  
632 using computeMatrix, plotHeatmap and plotProfile tools from the Deeptools 2.0 toolkit<sup>65</sup>. TF  
633 motif enrichment and peak annotation to genomic features were calculated using the scripts  
634 FindMotifsGenome.pl and AnnotatePeaks.pl from Homer software<sup>66</sup>, with standard  
635 parameters. For gene assignment to ChIP and ATAC peaks, coordinates were converted to  
636 Zv9 (danRer7) genome using the Liftover tool of the UCSC Genome Browser<sup>63</sup> and assigned  
637 to genes using the GREAT tool<sup>67</sup>, with the basal plus extension association rule with standard  
638 parameters (5 Kb upstream, 1 Kb downstream, 1 Mb maximum extension). Peak clustering  
639 was calculated using the mergeBed tool from Bedtools<sup>62</sup>, considering as clustered those peaks  
640 located less than 30 Kb from each other.

641

## 642 **HiC**

643 HiC library preparation was performed as previously described<sup>10</sup> with minor modifications.  
644 Experiments were performed for at least two biological replicates in wild-type and *ctcf*<sup>-/-</sup> mutant  
645 embryos at 48 hpf, using one to three million cells as input material.

646 Embryo fixation and nuclei extraction: Pools of 50 zebrafish embryos were dechorionated with  
647 300  $\mu$ g/ml pronase, followed by fixation for 10 min in 1% paraformaldehyde (in 200 mM  
648 phosphate buffer) at room temperature. The reaction was quenched by adding glycine to a  
649 final concentration of 0.125 M and incubation at room temperature for 5 min. Embryos were  
650 washed on ice twice with 1x PBS and either snap frozen in liquid nitrogen or processed for  
651 nuclei extraction. For nuclei extraction, fixed embryos were homogenized in 2-5 ml freshly  
652 prepared lysis buffer (50 mM Tris pH7.5; 150 mM NaCl; 5 mM EDTA; 0.5 % NP-40; 1.15 %  
653 Triton X-100; 1x Roche Complete protease inhibitors) with a Dounce Homogenizer on ice.

654 Nuclei were pelleted by centrifugation for 5 min, 750g at 4°C and washed with 1x PBS. Pelleted  
655 nuclei were either snap-frozen in liquid nitrogen or further processed.

656 Chromatin digestion: Nuclei pellets were resuspended in 100  $\mu$ l 0.5% SDS and incubated for  
657 10 min at 62°C, without shaking. 292  $\mu$ l water and 50  $\mu$ l 10% Triton X-100 were added to each  
658 sample, mixed, and incubated for 15 min at 37°C to quench remaining SDS. 50  $\mu$ l of 10x  
659 restriction enzyme buffer and a total of 400 units of DpnII (NEB, R0543) were added to the  
660 sample, mixed and incubated overnight at 37°C with 900 rpm shaking.

661 Biotin fill-in and proximity ligation: Restriction enzyme was heat inactivated. Nuclei were  
662 pelleted at 600 g for 10 min at 4°C and resuspended in 445  $\mu$ l 1x ice-cold NEB buffer 2. For  
663 biotin fill-in reaction, 5  $\mu$ l of 10x NEB buffer 2, 1.5  $\mu$ l 10 mM (each) dNTP-dATP-mix, 37.5  $\mu$ l of  
664 0.4 mM biotin-14-dATP and 10  $\mu$ l of 5 U/  $\mu$ l Klenow (NEB, M0210L) were added and mixed by  
665 pipetting. Samples were incubated at 25°C for 4 h and 800 rpm shaking. To ligate restriction  
666 fragment ends, 500  $\mu$ l of 2x ligation mix (100 $\mu$ l of 10x ligation buffer (NEB), 100  $\mu$ l of 10%  
667 Triton-X-100, 10  $\mu$ l of 10 mg/ml BSA, 6.5  $\mu$ l of T4 DNA ligase (NEB, M0202L), 283.5  $\mu$ l water)  
668 were added to each sample and incubated overnight at 16°C and 800 rpm shaking .

669 Cross-link reversal and DNA purification: Nuclei were pelleted by centrifugation for 10 min, 600  
670 g at 4°C and sample volume was reduced to a total of 200  $\mu$ l. 230  $\mu$ l of 10 mM Tris HCL pH  
671 7.5, 20  $\mu$ l of Proteinase K (10mg/ml) and 50  $\mu$ l of 10% SDS were added, mixed by pipetting  
672 and incubated 30 min at 55°C. Subsequently, 40  $\mu$ l of 4 M NaCl were added and samples were  
673 incubated overnight at 65°C with 700 rpm shaking. Next, 5  $\mu$ l of RNase A (10 mg/ml) were  
674 added, followed by incubation at 37°C for 30 min at 700 rpm. 20  $\mu$ l Proteinase K (10 mg/ml)  
675 were added to the sample and incubated at 55°C for 1-2 h at 700 rpm. DNA was purified by  
676 phenol-chloroform extraction. Following DNA precipitation, dried DNA pellet was reconstituted  
677 in 100  $\mu$ l 10 mM Tris-HCl pH 7.5.

678 Removing biotin from un-ligated fragments and DNA shearing: 5-7  $\mu$ g of HiC library in a total  
679 volume of 100  $\mu$ l (1x NEB buffer 2.1, 0.025 mM dNTPs, 0.12 U/  $\mu$ l T4 DNA polymerase (NEB,  
680 M0203) was incubated at 20°C for 4 h to remove biotin from unligated ends. Reaction was  
681 stopped by adding EDTA to a final concentration of 10 mM and heat inactivation for 20 min at  
682 75°C. DNA was sheared, using Covaris M220 sonicator with the following setup: 130  $\mu$ l sample  
683 volume, Peak Incident Power (W): 50, Duty Factor: 20%, Cycles per Burst: 200, Treatment  
684 Time (s): 65, cooling at 7°C. Samples were subsequently size selected for fragments between  
685 150 and 600 bp using AMPure XP beads (Agencourt, A63881) as follows: 0.575x volume of  
686 AMPure beads were added to the sample, mixed by pipetting, and incubated for 10 min at  
687 room temperature. Beads were separated on a magnet, and clear supernatant was transferred  
688 to a fresh tube. 0.395x volume of fresh AMPure beads were added to the supernatant, mixed,

689 and incubated for 10 min at room temperature. Beads were separated on a magnet, and clear  
690 supernatant was discarded. Beads were washed twice with 70% EtOH, air dried for 5 min and  
691 DNA was eluted in 300  $\mu$ l water.

692 Biotin pull down: Biotin-labelled DNA was bound to Dynabeads My One C1 Streptavidin beads,  
693 using 5  $\mu$ l of beads per 1  $\mu$ g DNA and following manufacturer's instructions. Beads were  
694 washed twice with 1x tween-washing-buffer (5 mM Tris HCl pH 7.5, 0.5 mM EDTA, 1 M NaCl,  
695 0.05% Tween 20) and finally resuspended in 1x sample volume 2x binding buffer (10 mM Tris  
696 HCl pH 7.5, 1 mM EDTA, 2 M NaCl). Beads were mixed with the DNA sample and incubated  
697 for 20 min at room temperature while rotating. Beads were separated on a magnet, twice  
698 washed with 1x tween-washing-buffer at 55°C and 700 rpm shaking for 2 min. Reclaimed  
699 beads were resuspended in 50  $\mu$ l water.

700 Sequencing library preparation: To repair DNA ends, DNA-bound beads were incubated in 100  
701  $\mu$ l end-repair mix containing 1x T4 Ligase Buffer (NEB), 0.5 mM dNTP mix, 0.5 U/  $\mu$ l T4  
702 Polynucleotide Kinase (NEB, M0201), 0.12 U/  $\mu$ l T4 DNA Polymerase (NEB, M0203) and 0.05  
703 U/  $\mu$ l Klenow (NEB, M0210). Samples were incubated for 30 min at 20°C. Beads were  
704 separated on a magnet, twice washed with 1x tween-washing-buffer at 55°C and 700 rpm  
705 shaking for 2 min. Reclaimed beads were resuspended in 50  $\mu$ l water. Next, dA-tail was added  
706 by incubating DNA-bound beads in 100  $\mu$ l A-tailing mix, containing 1x NEB buffer, 0.5  $\mu$ M  
707 dATP, and 0.25 U/  $\mu$ l Klenow, exo- (NEB, M0212). Samples were incubated for 30 min at 37°C.  
708 Beads were separated on a magnet, twice washed with 1x tween-washing-buffer at 55°C and  
709 700 rpm shaking for 2 min. Reclaimed beads were resuspended in 20  $\mu$ l water. Subsequently,  
710 samples were indexed by ligating TruSeq Illumina adaptors by incubating DNA-bound beads  
711 in 50  $\mu$ l adapter ligation mix, containing 1x T4 Ligation buffer, 5% PEG-4000, 0.3 U/  $\mu$ l T4 DNA  
712 Ligase (ThermoFisher, EL0011), 1.5  $\mu$ l TruSeq index adapter. The reaction was incubated at  
713 22°C for 2 hours with occasionally mixing. Beads were separated on a magnet, twice washed  
714 with 1x tween-washing-buffer at 55°C and 700 rpm shaking for 2 min. Reclaimed beads were  
715 resuspended in 50  $\mu$ l water. Final library for paired-end sequencing was prepared using  
716 NEBNext High-Fidelity 2X PCR Master Mix (NEB). PCR reaction: 50  $\mu$ l reaction, containing 1x  
717 NEBNext High-Fidelity PCR Master Mix, 0.3  $\mu$ M TruSeq Primer 1.0 (P5) and TruSeq Primer  
718 2.0 (P7), 3  $\mu$ l DNA-bound beads. PCR cycler setup: 1. 98°C for 60 seconds, 2. 98°C for 10  
719 seconds, 3. 65°C for 30 seconds, 4. 72°C for 30 seconds, 5. Go to step 2 for up to 10 cycles,  
720 6. 72°C for 5 min. Optimal cycle number was determined for each sample by analysing a 5  $\mu$ l  
721 aliquot on an agarose gel after 4, 6, 8, 10 and 12 cycles. For each sample, at least 8  
722 independent PCR reactions were performed to maintain initial library complexity and then  
723 pooled for AMPure beads purification. 1.2x volume of AMPure beads were added to the

724 sample, mixed by pipetting, and incubated for 10 min at room temperature. Beads were  
725 separated on a magnet, and clear supernatant was discarded. Beads were washed twice with  
726 70% EtOH, and air dried for 5 min. DNA was eluted in 50  $\mu$ l water. Libraries were multiplexed  
727 and sequenced using DNBseq technology to produce 50 bp paired-end reads and  
728 approximately 400 million raw sequencing read pairs for each genotype.

729

### 730 **HiC data analyses**

731 Mapping, filtering, normalization and visualization: HiC paired-end reads were mapped to the  
732 zebrafish genome assembly GRCz10 (danRer10) using BWA<sup>68</sup>. Reads from biological  
733 replicates were pooled before mapping. Then, ligation events (HiC pairs) were detected and  
734 sorted, and PCR duplicates were removed, using the pairtools package  
735 (<https://github.com/mirnylab/pairtools>). Unligated and self-ligated events (dangling and extra-  
736 dangling ends, respectively) were filtered out by removing contacts mapping to the same or  
737 adjacent restriction fragments. The resulting filtered pairs file was converted to a tsv file that  
738 was used as input for Juicer Tools Pre<sup>69</sup>, which generated multiresolution hic files. HiC matrices  
739 at 10 and 500 Kb resolution, normalized with the Knight-Ruiz (KR) method<sup>70</sup>, were extracted  
740 for downstream analysis using the FAN-C toolkit<sup>71</sup>. Visualization of normalized HiC matrices  
741 and other values described below, such as insulation scores, TAD boundaries, aggregate TAD  
742 and loop analysis, Pearson's correlation matrices and eigenvectors, were calculated and  
743 visualized using FAN-C.

744 TADs, chromatin loops and compartmentalization: TAD boundaries were called using the  
745 insulation score method, as previously described<sup>40</sup>. Insulation scores were calculated for 10-  
746 Kb binned HiC matrices using FAN-C<sup>71</sup>. Briefly, the average number of interactions of each bin  
747 were calculated in 500-Kb square sliding windows (50 x 50 bins); then, these values were  
748 normalized as the  $\log_2$  ratio of each bin's value and the mean of all bins to obtain the insulation  
749 score for each bin; next, minima along the insulation score vector were calculated using a delta  
750 vector of +/-100 Kb (+/-10 bins) around the central bin; finally, boundaries with scores lower  
751 than 0.5 were filtered out. The genomic regions located between adjacent boundaries were  
752 considered as TADs.

753 For determination of A and B compartments, 500-Kb binned HiC matrices were used.  
754 Pearson's correlation matrices were calculated as previously described<sup>72</sup>, using FAN-C<sup>71</sup>. A/B  
755 compartments and their strength were determined using the 2<sup>nd</sup> eigenvector, since the 1<sup>st</sup>  
756 eigenvector corresponded with chromosome arms in our system, and the genome GC content.  
757 A/B domains were defined as consecutive regions with the same eigenvector sign. A/B



758 enrichment profiles were calculated by dividing bins in fifty percentiles according to their 2<sup>nd</sup>  
759 eigenvector values and plotting their average observed/expected contact values.

760 Chromatin loops were called using HICCUPS<sup>10</sup>, with standard parameters. Briefly, the  
761 multiresolution hic file was used as input for the CPU version of HICCUPS, which run using 5,  
762 10 and 25-Kb resolution KR-normalized matrices. The maximum permitted FDR value was 0.1  
763 for the three resolutions; the peak widths were 4, 2 and 1 bin for 5, 10 and 25-Kb resolutions,  
764 respectively; and the window widths to define the local neighborhoods used as background  
765 were 7, 5 and 3 bins, respectively. The thresholds for merging loop lists from different  
766 resolutions were the following: maximum sum of FDR values of 0.02 for the horizontal, vertical,  
767 donut and lower-left neighborhoods; minimum enrichment of 1.5 for the horizontal and vertical  
768 neighborhoods; minimum enrichment of 1.75 for the donut and bottom-left neighborhoods;  
769 minimum enrichment of 2 for either the donut or the bottom-left neighborhoods. The distances  
770 used to merge the nearby pixels to a centroid were 20, 20 and 50-Kb for 5, 10 and 25-Kb  
771 resolutions, respectively. CTCF-bound and chromatin loops were considered when at least  
772 one of the loop anchors overlapped with a CTCF ChIP-seq peak.

773

#### 774 **UMI-4C**

775 UMI-4C library preparation was performed as previously described<sup>73</sup> with modifications in 3C  
776 library preparation and minor modification in sequencing library preparation. Experiments were  
777 performed in singletons in wild-type and *ctcf*<sup>-/-</sup> mutant embryos at 48 hpf, using one to three  
778 million cells as input material. Embryo fixation, nuclei extraction, chromatin digestion, biotin fill-  
779 in, proximity ligation, cross-link reversal, and DNA purification were performed following above  
780 experimental procedure for HiC. The following procedure were specific for UMI-4C.

781 DNA shearing: 5-7  $\mu$ g of purified DNA was sheared with Covaris M220 sonicator with the  
782 following setup: 130  $\mu$ l sample volume, Peak Incident Power (W): 50, Duty Factor: 10%, Cycles  
783 per Burst: 200, Treatment Time (s): 70, cooling at 7°C. Samples were then purified using  
784 AMPure XP beads (Agencourt, A63881) as follows: 2.0x volume of AMPure beads were added  
785 to the sample, mixed by pipetting, and incubated for 10 min at room temperature. Beads were  
786 separated on a magnet, and clear supernatant was discarded. Beads were washed twice with  
787 70% EtOH, and air dried for 5 min. DNA was eluted in 300  $\mu$ l water.

788 Biotin pull down: Biotin-labelled DNA was bound to Dynabeads My One C1 Streptavidin beads,  
789 using 5  $\mu$ l of beads per 1  $\mu$ g DNA and following manufacturer's instructions. Beads were  
790 washed twice with 1x tween-washing-buffer (5 mM Tris HCl pH 7.5, 0.5 mM EDTA, 1 M NaCl,  
791 0.05% Tween 20) and finally resuspended in 1x sample volume 2x binding buffer (10 mM Tris  
792 HCl pH 7.5, 1 mM EDTA, 2 M NaCl). Beads were mixed with the DNA sample and incubated

793 for 20 min at room temperature while rotating. Beads were separated on a magnet, twice  
794 washed with 1x tween-washing-buffer at 55°C and 700 rpm shaking for 2 min. Reclaimed  
795 beads were resuspended in 50  $\mu$ l water.

796 Sequencing library preparation: 500 ng of DNA attached to beads were end-repaired by  
797 incubating in 100  $\mu$ l end-repair mix (1x T4 Ligase Buffer (NEB), 0.5 mM dNTP mix, 0.12 U/  $\mu$ l  
798 T4 DNA Polymerase (NEB, M0203) and 0.05 U/  $\mu$ l Klenow (NEB, M0210)) for 30 min at 20°C.  
799 Beads were separated on a magnet, twice washed with 1x tween-washing-buffer at 55°C and  
800 700 rpm shaking for 2 min. Reclaimed beads were resuspended in 50  $\mu$ l water. Next, DNA-  
801 bound beads were incubated for 30 min at 37°C in 100  $\mu$ l A-tailing mix (1x NEB buffer, 0.5  $\mu$ M  
802 dATP, and 0.25 U/  $\mu$ l Klenow, exo- (NEB, M0212)). The enzyme was heat inactivated at 75°C  
803 for 20 min. For 5' dephosphorylation of DNA ends, 2  $\mu$ l of Alkaline Phosphatase, Calf Intestinal  
804 (NEB, M0290) was added and samples were incubated at 37°C for 1 hour and with  
805 occasionally mixing. Beads were separated on a magnet, twice washed with 1x tween-  
806 washing-buffer at 55°C and 700 rpm shaking for 2 min. Reclaimed beads were resuspended  
807 in 20  $\mu$ l water. Next, samples were indexed by ligating TruSeq Illumina adaptors by incubating  
808 DNA-bound beads in 50  $\mu$ l adapter ligation mix (1x T4 Ligation buffer, 5% PEG-4000, 0.3 U/  
809  $\mu$ l T4 DNA Ligase (ThermoFisher, EL0011), 1.5  $\mu$ l TruSeq index adapter). The reaction was  
810 incubated at 22°C for 2 hours with occasionally mixing. Sample volume was increased with  
811 water to a total 100  $\mu$ l and incubated at 96°C for 5 min to denature DNA and remove non-  
812 ligated strand from adapter. Sample were placed on ice and beads were separated on a  
813 magnet, twice washed with 1x tween-washing-buffer at 55°C and 700 rpm shaking for 2 min.  
814 Reclaimed beads were resuspended in 20  $\mu$ l water. Final library for paired-end sequencing  
815 was prepared using NEBNext High-Fidelity 2X PCR Master Mix (NEB) and a nested PCR  
816 approach as described in Schwartzman et al. 2016. Individual viewpoints are defined by US  
817 (upstream) and DS (downstream) primers within the DpnII fragment of interest ([Extended Data](#)  
818 [Table 1](#)). US and DS primers were designed with melting temperature of 58°C. DS primers  
819 were designed between 5-15 bp from the interrogated DpnII restriction site and containing P5  
820 sequence at their 5' end. US primers were designed within a region of up to 100 bp of  
821 interrogated DpnII restriction site and with only minimal overlap with DS primers. Up to 14 US  
822 and DS primers were pooled for multiplex PCR reaction, respectively. First PCR reaction: 50  
823  $\mu$ l reaction, containing 1x NEBNext High-Fidelity 2X PCR Master Mix, 0.3  $\mu$ M US primer mix  
824 (each) and 0.3  $\mu$ M TruSeq Primer 2.0 (P7), 200 ng DNA-bound on beads. PCR cycler setup:  
825 1. 98°C for 30 seconds, 2. 98°C for 10 seconds, 3. 58°C for 30 seconds, 4. 72°C for 60  
826 seconds, 5. Go to step 2 for 18 cycles in total, 6. 72°C for 5 min. For each sample two PCR  
827 reactions were performed and then pooled for AMPure beads purification. 1.2x volume of

828 AMPure beads were added to the sample, mixed by pipetting, and incubated for 10 min at  
829 room temperature. Beads were separated on a magnet, and clear supernatant was discarded.  
830 Beads were washed twice with 70% EtOH, air dried, and DNA was eluted in 30  $\mu$ l water.  
831 Second PCR reaction: 50  $\mu$ l reaction, containing 1x NEBNext High-Fidelity 2X PCR Master  
832 Mix, 0.3  $\mu$ M DS primer mix (each) and 0.3  $\mu$ M TruSeq Primer 2.0 (P7), 100 ng DNA from first  
833 PCR. PCR cycler setup: Corresponded to setup of first PCR but with 15 cycles. For each  
834 sample 3-5 PCR reactions were performed and then pooled for size selection for fragments  
835 between 200 and 700 bp, using AMPure beads. 0.575x volume of AMPure beads were added  
836 to the sample, mixed by pipetting, and incubated for 10 min at room temperature. Beads were  
837 separated on a magnet, and clear supernatant was transferred to a fresh tube. 0.3x volume of  
838 fresh AMPure beads were added to the supernatant, mixed, and incubated for 10 min at room  
839 temperature. Beads were separated on a magnet, and clear supernatant was discarded.  
840 Beads were washed twice with 70% EtOH, and air dried for 5 min. DNA was eluted in 300  $\mu$ l  
841 water. Libraries were multiplexed and sequenced using DNBseq technology to produce 50 bp  
842 paired-end reads and approximately 1-5 million raw sequencing read pairs for each viewpoint  
843 and genotype.

844 For the UMI-4C data analysis, raw fastq files were processed using the R package  
845 umi4cpackage (<https://bitbucket.org/tanaylab/umi4cpackage>). Contact profiles and  
846 domainograms were generated using the default parameters and a minimum win\_cov of 10.

847

#### 848 **Statistical analyses**

849 For comparison of insulation scores, TAD sizes, loop ranges and expression fold-changes  
850 among datasets, two-tailed Wilcoxon's rank sum tests were used. In [Fig. 3f](#) and [Extended data](#)  
851 [Fig. 7](#), box plots represent: center line, median; box limits, upper and lower quartiles; whiskers,  
852 1.5x interquartile range; notches, 95% confidence interval of the median. Other boxplots  
853 represent the same parameters but do not include notches. Statistical significance of  
854 contingency tables was assessed using the Fisher's exact test.

855

#### 856 **Data availability**

857 HiC, ChIPmentation, RNA-seq, ATAC-seq and UMI-4C data generated in this study are  
858 available through the Gene Expression Omnibus (GEO) accession number GSE156099  
859 [<https://www.ncbi.nlm.nih.gov/geo/query/acc.cgi?acc=GSE156099>].

860

#### 861 **Code availability**

862 Custom code used in this study is available at the Gitlab repository:  
863 [https://gitlab.com/rdacemel/hic\\_ctcf-null](https://gitlab.com/rdacemel/hic_ctcf-null).

864

## 865 **Methods' References**

866

867 48 Moreno-Mateos, M. A. *et al.* CRISPRscan: designing highly efficient sgRNAs for  
868 CRISPR-Cas9 targeting in vivo. *Nat Methods* **12**, 982-988, doi:10.1038/nmeth.3543  
869 (2015).

870 49 Carmona-Aldana, F. *et al.* CTCF knockout reveals an essential role for this protein  
871 during the zebrafish development. *Mech Dev* **154**, 51-59,  
872 doi:10.1016/j.mod.2018.04.006 (2018).

873 50 Freitas, R., Gomez-Marin, C., Wilson, J. M., Casares, F. & Gomez-Skarmeta, J. L.  
874 Hoxd13 contribution to the evolution of vertebrate appendages. *Dev Cell* **23**, 1219-  
875 1229, doi:10.1016/j.devcel.2012.10.015 (2012).

876 51 Tena, J. J. *et al.* Odd-skipped genes encode repressors that control kidney  
877 development. *Dev Biol* **301**, 518-531, doi:10.1016/j.ydbio.2006.08.063 (2007).

878 52 Dobin, A. *et al.* STAR: ultrafast universal RNA-seq aligner. *Bioinformatics* **29**, 15-21,  
879 doi:10.1093/bioinformatics/bts635 (2013).

880 53 Anders, S., Pyl, P. T. & Huber, W. HTSeq--a Python framework to work with high-  
881 throughput sequencing data. *Bioinformatics* **31**, 166-169,  
882 doi:10.1093/bioinformatics/btu638 (2015).

883 54 Love, M. I., Huber, W. & Anders, S. Moderated estimation of fold change and  
884 dispersion for RNA-seq data with DESeq2. *Genome Biol* **15**, 550,  
885 doi:10.1186/s13059-014-0550-8 (2014).

886 55 Huang da, W., Sherman, B. T. & Lempicki, R. A. Systematic and integrative analysis  
887 of large gene lists using DAVID bioinformatics resources. *Nat Protoc* **4**, 44-57,  
888 doi:10.1038/nprot.2008.211 (2009).

889 56 Buenrostro, J. D., Giresi, P. G., Zaba, L. C., Chang, H. Y. & Greenleaf, W. J.  
890 Transposition of native chromatin for fast and sensitive epigenomic profiling of open  
891 chromatin, DNA-binding proteins and nucleosome position. *Nat Methods* **10**, 1213-  
892 1218, doi:10.1038/nmeth.2688 (2013).

893 57 Fernandez-Minan, A., Bessa, J., Tena, J. J. & Gomez-Skarmeta, J. L. Assay for  
894 transposase-accessible chromatin and circularized chromosome conformation  
895 capture, two methods to explore the regulatory landscapes of genes in zebrafish.  
896 *Methods Cell Biol* **135**, 413-430, doi:10.1016/bs.mcb.2016.02.008 (2016).

897 58 Santos-Pereira, J. M., Gallardo-Fuentes, L., Neto, A., Acemel, R. D. & Tena, J. J.  
898 Pioneer and repressive functions of p63 during zebrafish embryonic ectoderm  
899 specification. *Nat Commun* **10**, 3049, doi:10.1038/s41467-019-11121-z (2019).

900 59 Schmidl, C., Rendeiro, A. F., Sheffield, N. C. & Bock, C. ChIPmentation: fast, robust,  
901 low-input ChIP-seq for histones and transcription factors. *Nat Methods* **12**, 963-965,  
902 doi:10.1038/nmeth.3542 (2015).

903 60 Langmead, B. & Salzberg, S. L. Fast gapped-read alignment with Bowtie 2. *Nat*  
904 *Methods* **9**, 357-359, doi:10.1038/nmeth.1923 (2012).

905 61 Li, H. *et al.* The Sequence Alignment/Map format and SAMtools. *Bioinformatics* **25**,  
906 2078-2079, doi:10.1093/bioinformatics/btp352 (2009).

907 62 Quinlan, A. R. & Hall, I. M. BEDTools: a flexible suite of utilities for comparing  
908 genomic features. *Bioinformatics* **26**, 841-842, doi:10.1093/bioinformatics/btq033  
909 (2010).

910 63 Haeussler, M. *et al.* The UCSC Genome Browser database: 2019 update. *Nucleic*  
911 *Acids Res* **47**, D853-D858, doi:10.1093/nar/gky1095 (2019).

- 912 64 Zhang, Y. *et al.* Model-based analysis of ChIP-Seq (MACS). *Genome Biol* **9**, R137,  
913 doi:10.1186/gb-2008-9-9-r137 (2008).
- 914 65 Ramirez, F. *et al.* deepTools2: a next generation web server for deep-sequencing  
915 data analysis. *Nucleic Acids Res* **44**, W160-165, doi:10.1093/nar/gkw257 (2016).
- 916 66 Heinz, S. *et al.* Simple combinations of lineage-determining transcription factors prime  
917 cis-regulatory elements required for macrophage and B cell identities. *Mol Cell* **38**,  
918 576-589, doi:10.1016/j.molcel.2010.05.004 (2010).
- 919 67 Hiller, M. *et al.* Computational methods to detect conserved non-genic elements in  
920 phylogenetically isolated genomes: application to zebrafish. *Nucleic Acids Res* **41**,  
921 e151, doi:10.1093/nar/gkt557 (2013).
- 922 68 Li, H. & Durbin, R. Fast and accurate short read alignment with Burrows-Wheeler  
923 transform. *Bioinformatics* **25**, 1754-1760, doi:10.1093/bioinformatics/btp324 (2009).
- 924 69 Durand, N. C. *et al.* Juicer Provides a One-Click System for Analyzing Loop-  
925 Resolution Hi-C Experiments. *Cell Syst* **3**, 95-98, doi:10.1016/j.cels.2016.07.002  
926 (2016).
- 927 70 Knight, P. A. & Ruiz, D. A fast algorithm for matrix balancing. *IMA Journal of*  
928 *Numerical Analysis* **33**, 1029-1047, doi:10.1093/imanum/drs019 (2012).
- 929 71 Kruse, K., Hug, C. B. & Vaquerizas, J. M. FAN-C: A Feature-rich Framework for the  
930 Analysis and Visualisation of C data. *bioRxiv*, 2020.2002.2003.932517,  
931 doi:10.1101/2020.02.03.932517 (2020).
- 932 72 Lieberman-Aiden, E. *et al.* Comprehensive mapping of long-range interactions  
933 reveals folding principles of the human genome. *Science* **326**, 289-293,  
934 doi:10.1126/science.1181369 (2009).
- 935 73 Schwartzman, O. *et al.* UMI-4C for quantitative and targeted chromosomal contact  
936 profiling. *Nat Methods* **13**, 685-691, doi:10.1038/nmeth.3922 (2016).
- 937

938

## 939 **Acknowledgements**

940 We thank C. Paliou for critical reading of the manuscript; C. Bolt and L. Delisle from the  
941 Duboule lab for technical advice with the UMI-4C protocol; F. Rencillas-Targa for providing the  
942 zebrafish-specific CTCF antibody; the CABD Fish and Microscopy Facilities for technical  
943 assistance; and C3UPO for the HPC support. JLG-S received funding from the ERC (Grant  
944 Agreement No. 740041), the Spanish Ministerio de Economía y Competitividad (Grant No.  
945 BFU2016-74961-P) and the institutional grant Unidad de Excelencia María de Maeztu (MDM-  
946 2016-0687). JT was funded by a 2019 Leonardo Grant for Researchers and Cultural Creators,  
947 BBVA Foundation. MF was funded by the European Union's Horizon 2020 research and  
948 innovation programme under the Marie Skłodowska-Curie grant agreement [#800396] and a  
949 Juan de la Cierva-Formación fellow from the Spanish Ministry of Science and Innovation  
950 (FJC2018-038233-I).

951

## 952 **Author contributions**

953 MF, JMS-P and JLG-S conceived and designed the project; EC-M, MF, AN and JMS-P  
954 performed the experiments; JMS-P, MF, RDA and JJT analyzed the data; MF, JMS-P and  
955 JLG-S wrote the manuscript.



956

957 **Competing interests**

958 The authors declare no conflict of interests.

959

960 **Correspondence and requests for materials** should be addressed to JMS-P or JLG-S.

961

962 **EXTENDED DATA**

963

964 **Extended Data Table 1 – List of primers used in this study**

965

| Primer name          | Primer sequence                                                                              |
|----------------------|----------------------------------------------------------------------------------------------|
| CTCFexon4            | 5'-AATACGACTCACTATAGGAGTTACACTTGCCACGCGTTTTA<br>GAGCTAGAA_3'                                 |
| CTCFexon5            | 5'-TAATACGACTCACTATAGGCATGGCCTTTGTCACCAGGTTTT<br>AGAGCTAGAA-3'                               |
| sgRNA_univ           | 5'-AAAAGCACCGACTCGGTGCCACTTTTTCAAGTTGATAACGGA<br>CTAGCCTTATTTTAACTTGCTATTTCTAGCTCTAAAAC-3'   |
| CTCFpF               | 5'-CAAGCTGCGCTACAACACAG-3'                                                                   |
| CTCFpR               | 5'-CTCCTGTGTGGGAGCGAATG-3'                                                                   |
| ptch2F               | 5'-TCCTGTGCTGTTTCTACAGG-3'                                                                   |
| ptch2R               | 5'-GGATCCATTAACCCTCACTAAAGGGAATGCGCAGAACAAGTTATAGG-3'                                        |
| hoxa5aF              | 5'-GGCGTGGACTATCCCTTAC-3'                                                                    |
| hoxa5aR              | 5'-GGATCCATTAACCCTCACTAAAGGGAAGGAGGCCAATCACACCTTAC-3'                                        |
| hoxa9aF              | 5'-CCCTTCCCTCTACCTTTTCC-3'                                                                   |
| hoxa9aR              | 5'-GGATCCATTAACCCTCACTAAAGGGAAGAAGGTCAACAGACCATGAGG-3'                                       |
| hoxc1aF              | 5'-GTCTGTGGATGGAGTTTCG-3'                                                                    |
| hoxc1aR              | 5'-GGATCCATTAACCCTCACTAAAGGGAAGGTGCTTTAACGGTACGTG-3'                                         |
| umi4C-ptch2-<br>US   | 5'-CATCAAACCACCCTTTTCAG-3'                                                                   |
| umi4C-ptch2-<br>DS   | 5'-AATGATACGGCGACCACCGAGATCTACACTCTTTCCCTACACGACGCTCTTCC<br>GATCTGGGCTACCTCTCCAAATGTT-3'     |
| umi4C-<br>hoxd4a-US  | 5'-TTTCCCTACCTTCAGAAATTAATGG-3'                                                              |
| umi4C-<br>hoxd4a-DS  | 5'-AATGATACGGCGACCACCGAGATCTACACTCTTTCCCTACACGACGCTCTTCC<br>GATCTTCGTACATGGTGAACCTCAA-3'     |
| umi4C-<br>hoxd13a-US | 5'-GAGCGTGAATACAACACCACTA-3'                                                                 |
| umi4C-<br>hoxd13a-DS | 5'-AATGATACGGCGACCACCGAGATCTACACTCTTTCCCTACACGACGCTCTTCC<br>GATCTCCACTAAGTTCATTACAAAGGAGA-3' |

966

967

968

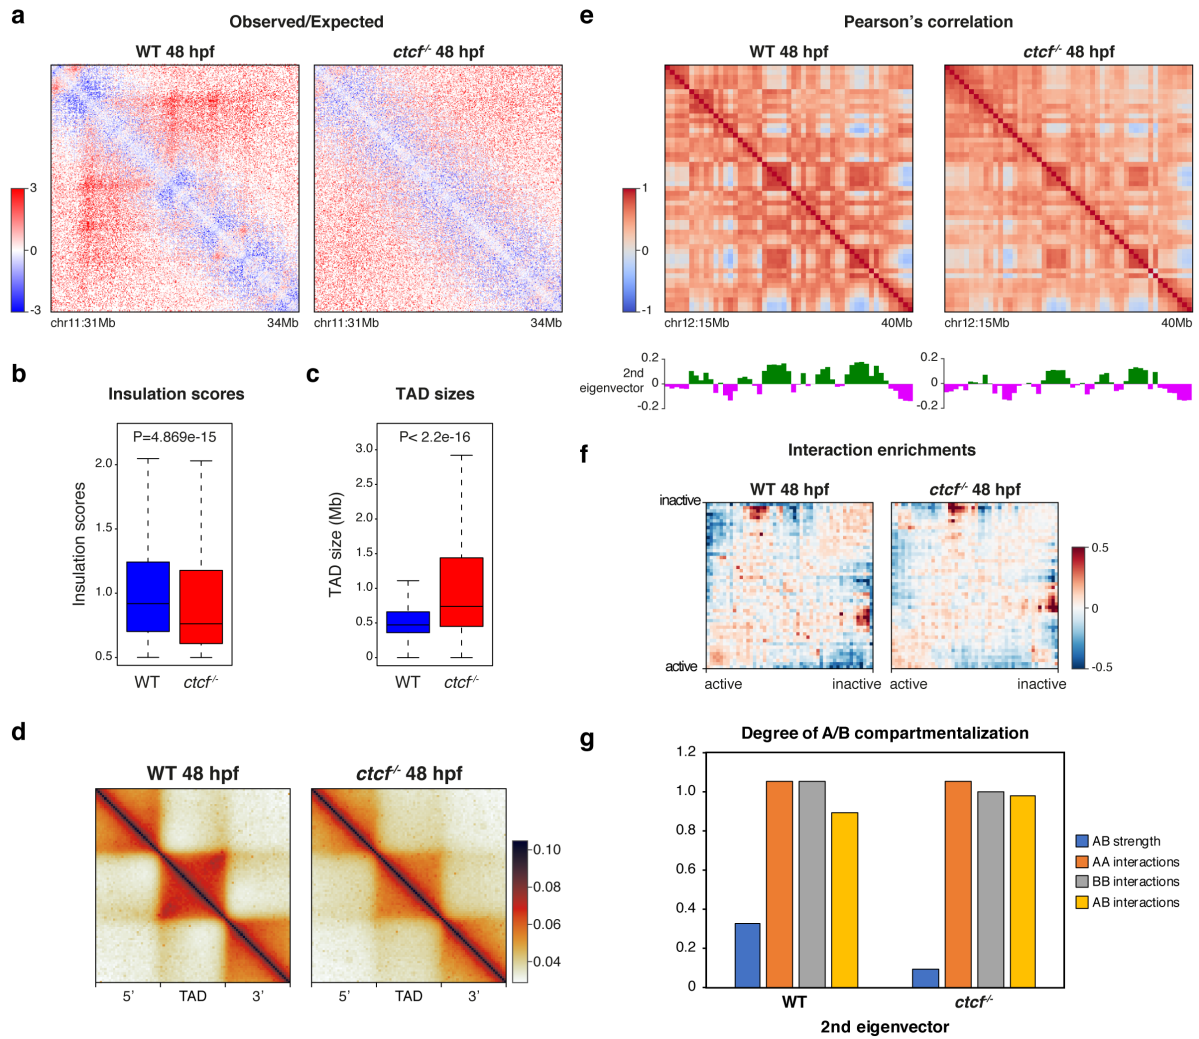

969

970 **Extended Data Figure 1. Chromatin structure in zebrafish embryos requires CTCF.** **a**, HiC observed/expected  
971 contact maps at 10 Kb resolution in WT and *ctcf*<sup>-/-</sup> zebrafish embryos at 48 hpf. The 3-Mb genomic region shown in  
972 Figure 1c is plotted. **b-c**, Box plots showing the insulation scores of the TAD boundaries (b) and the TAD sizes (c)  
973 in WT and *ctcf*<sup>-/-</sup> embryos at 48 hpf. Statistical significance was assessed using the Wilcoxon's rank sum test. **d**,  
974 Aggregate analysis of normalized HiC signal in WT and *ctcf*<sup>-/-</sup> embryos at 48 hpf for the 2,438 TADs called in WT  
975 embryos, rescaled and surrounded by windows of the same size. **e**, Pearson's correlation matrices from HiC data  
976 at 500 Kb resolution in WT and *ctcf*<sup>-/-</sup> embryos at 48 hpf. A 25-Mb genomic region is plotted, aligned with the 2<sup>nd</sup>  
977 eigenvector demarcating A and B compartments. **f**, Saddle plots showing the genome-wide interaction enrichments  
978 between active and inactive genomic regions from HiC data in WT and *ctcf*<sup>-/-</sup> embryos at 48 hpf. **g**, Bar plots showing  
979 the degree of compartmentalization in WT and *ctcf*<sup>-/-</sup> embryos at 48 hpf. AB strength and quantification of AA, BB  
980 and AB interactions based in the 2<sup>nd</sup> eigenvector, are plotted.  
981

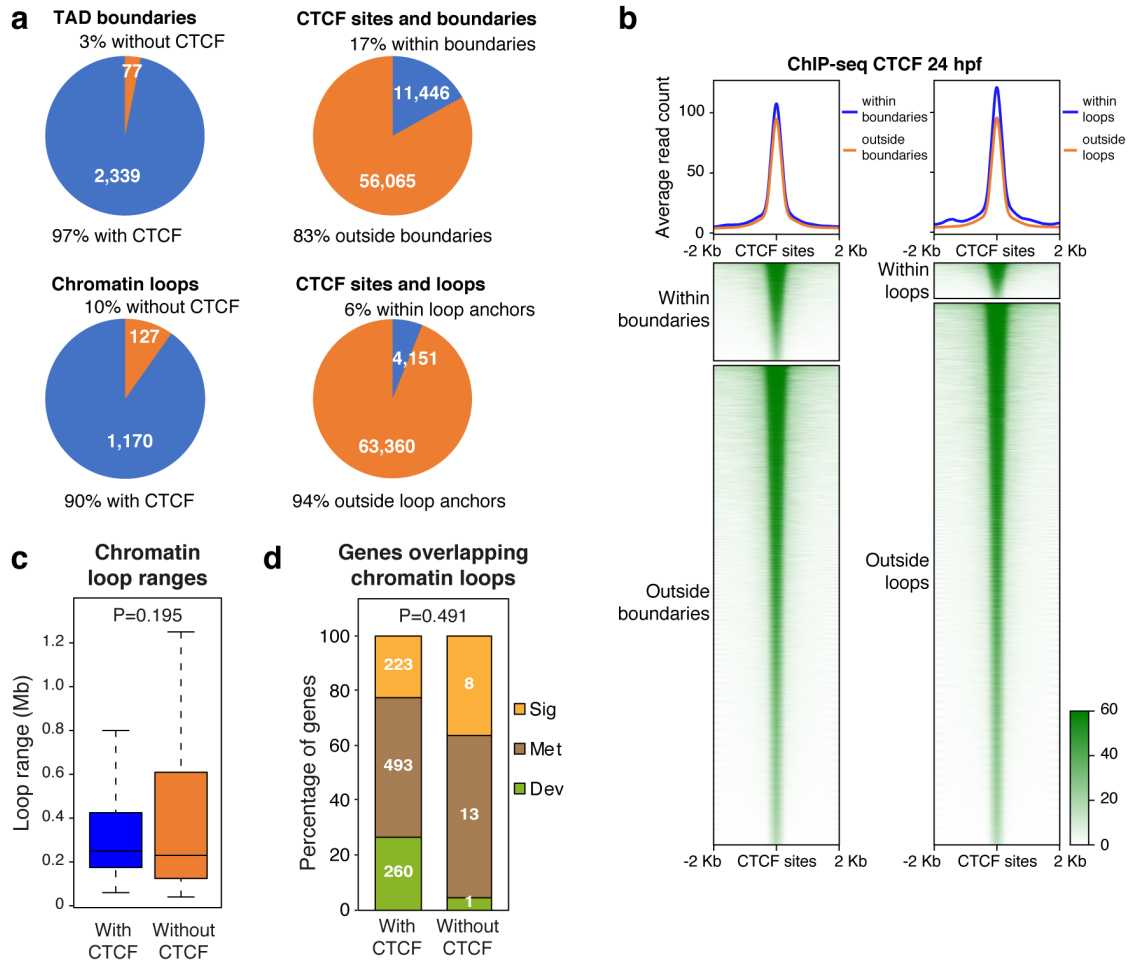

982

983 **Extended Data Figure 2. CTCF is bound to TAD boundaries and chromatin loops in zebrafish embryos. a,**  
 984 Pie charts showing the percentage of TADs or chromatin loops overlapping with CTCF sites (left) and the  
 985 percentage of CTCF sites overlapping with TADs or chromatin loops (right). **b,** Heatmaps and average profiles of  
 986 CTCF ChIP-seq signal at CTCF sites overlapping or not with TADs or chromatin loops. **c,** Box plots showing the  
 987 distance between loop anchors (loop ranges) for the chromatin loops overlapping or not with CTCF sites at least in  
 988 one of their anchors. Statistical significance was assessed using the Wilcoxon's rank sum test. **d,** Proportion of  
 989 genes annotated to the GO terms "Signaling", "Metabolic process" and "Developmental process" for genes  
 990 overlapping with chromatin loop anchors, with or without CTCF binding. Statistical significance was assessed using  
 991 the Fisher's exact test.  
 992

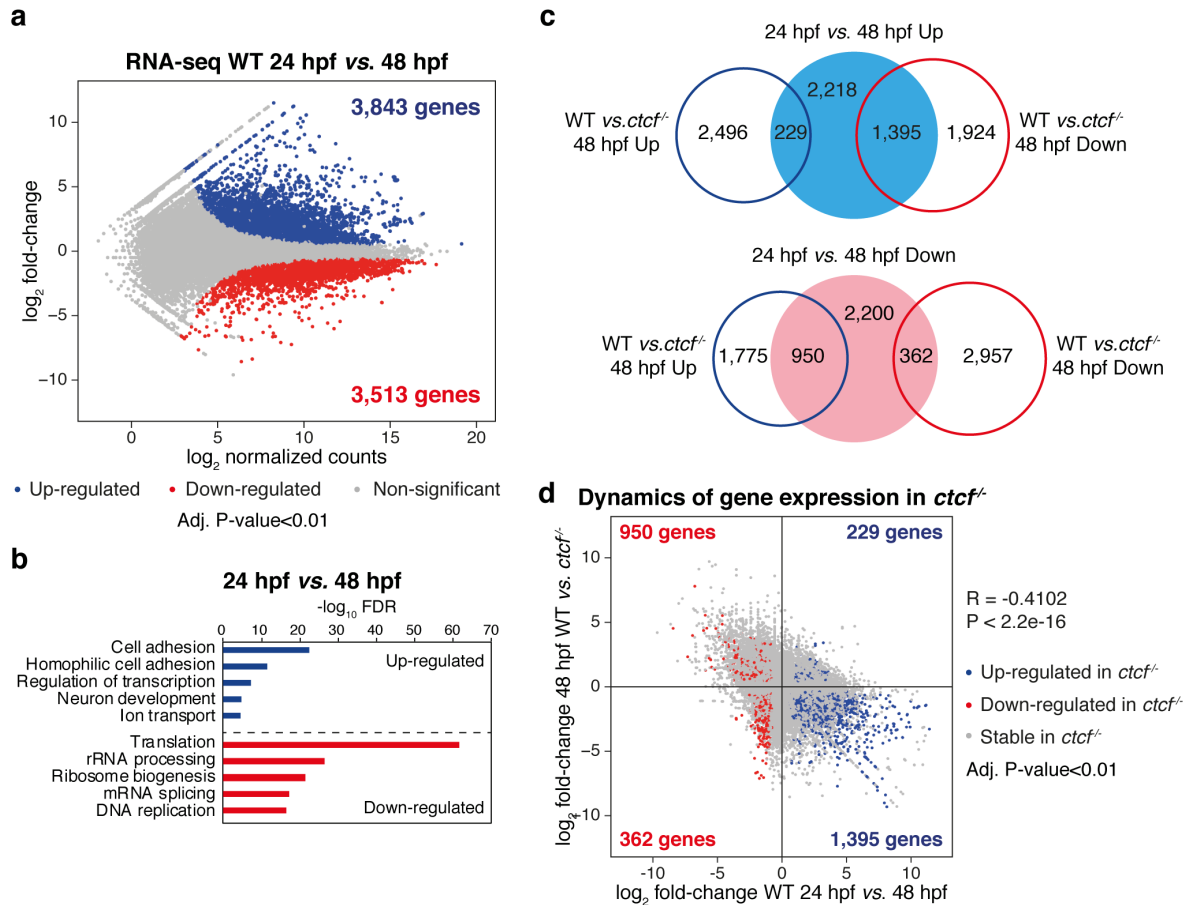

993

994

**Extended Data Figure 3. CTCF is required for dynamic expression changes during development.**

995

Differential analysis of gene expression in WT embryos between 24 and 48 hpf from RNA-seq data (n = 2 biological

996

replicates per condition). The log<sub>2</sub> normalized read counts of 24-hpf transcripts versus the log<sub>2</sub> fold-change of

997

expression are plotted. Transcripts showing a statistically significant differential expression (adjusted P-value <

998

0.01) are highlighted in blue (up-regulated) or red (down-regulated). The number of genes that correspond to the

999

up- and down-regulated transcripts are shown inside the boxes. **b**, GO enrichment analyses of biological processes

1000

for the up- and down-regulated genes in WT embryos from 24 to 48 hpf. Terms showing an FDR < 0.05 are

1001

considered as enriched. **c**, Venn diagrams showing the overlap between the genes up- and down-regulated in WT

1002

embryos from 24 to 48 hpf and the genes up- and down-regulated in *ctcf*<sup>-/-</sup> embryos at 48 hpf (see Fig. 2b). **d**,

1003

Scatter plots showing the correlation between the expression fold change of all transcripts in WT embryos from 24

1004

to 48 hpf, and their expression fold change in *ctcf*<sup>-/-</sup> embryos at 48 hpf. Up- and down-regulated transcripts in *ctcf*<sup>-/-</sup>

1005

embryos are highlighted in blue or red, respectively.

1006



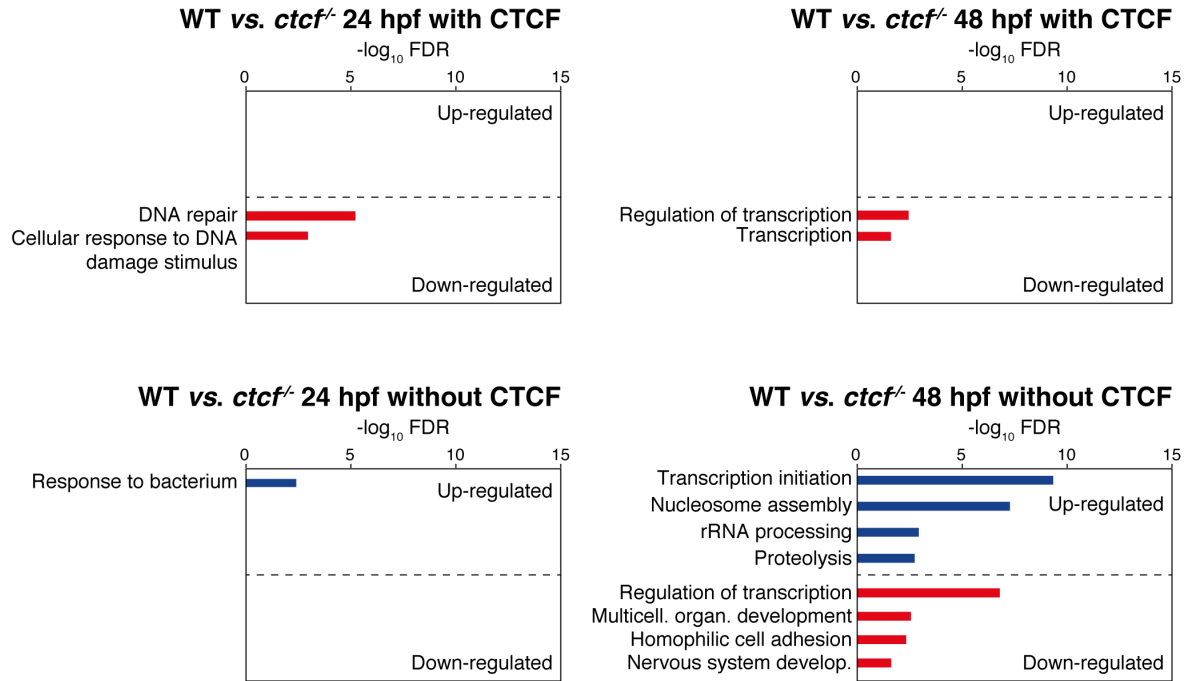

1007

1008

1009

1010

1011

1012

**Extended Data Figure 4. CTCF absence leads to down-regulation of developmental genes.** GO enrichment analyses of biological processes for the up- and down-regulated genes in *ctcf*<sup>-/-</sup> embryos at 24 (left) and 48 hpf (right), distinguishing between those genes with (top) or without (bottom) CTCF binding at their TSS. Terms showing a false discovery rate (FDR) < 0.05 are considered as enriched.

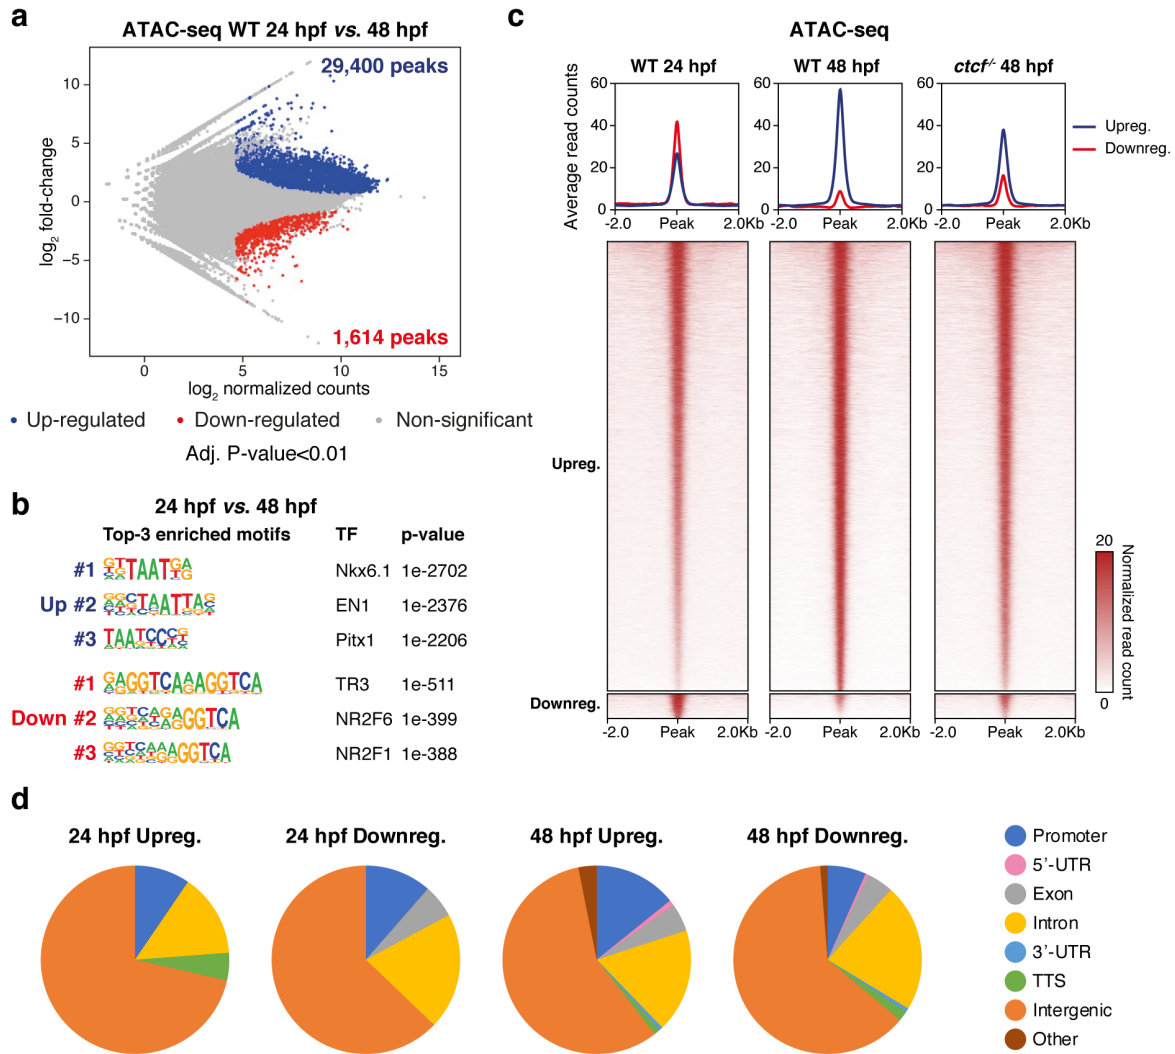

1013

1014

1015

1016

1017

1018

1019

1020

1021

1022

1023

1024

**Extended Data Figure 5. The dynamics of the chromatin accessibility landscape requires CTCF.** **a**, Differential analysis of chromatin accessibility in WT embryos between 24 and 48 hpf from ATAC-seq data ( $n = 2$  biological replicates per condition). The  $\log_2$  normalized read counts of 24-hpf ATAC peaks versus the  $\log_2$  fold-change of accessibility are plotted. Regions showing a statistically significant differential accessibility (adjusted P-value  $< 0.01$ ) are highlighted in blue (up-regulated) or red (down-regulated). The number of peaks that correspond to the up- and down-regulated sites are shown inside the boxes. **b**, Motif enrichment analyses for the up- and down-regulated ATAC peaks in WT embryos from 24 to 48 hpf. The 3 motifs with the lowest p-values are shown for each case. **c**, Heatmaps and average profiles plotting normalized ATAC-seq signal in WT embryos at 24 and 48 hpf and in *ctcf*<sup>-/-</sup> embryos at 48 hpf for the up- and down-regulated peaks from (a). **d**, Pie charts showing the annotation to different genomic features of ATAC-peaks up- or down-regulated in *ctcf*<sup>-/-</sup> embryos at 24 or 48 hpf (see Fig. 3a-b).

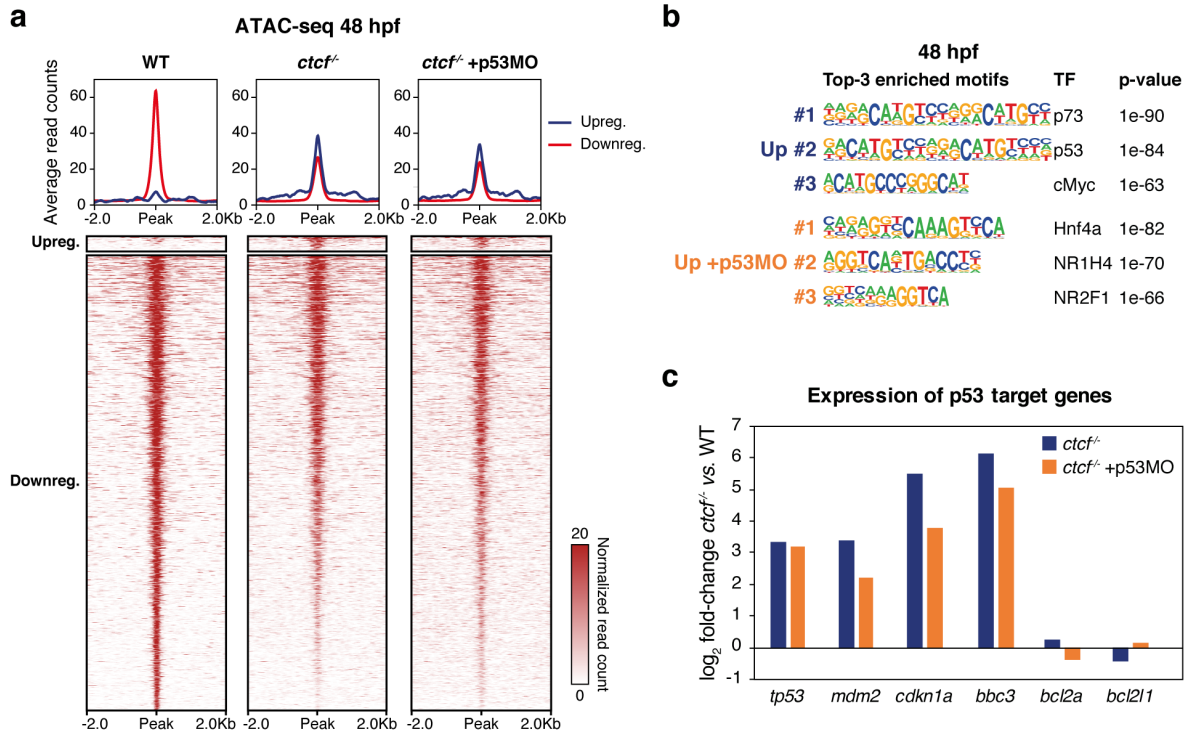

1025

1026

1027

1028

1029

1030

1031

1032

1033

**Extended Data Figure 6. The p53 pro-apoptotic response in the absence of CTCF does not suppress defects in chromatin accessibility.** **a**, Heatmaps and average profiles plotting normalized ATAC-seq signal in WT, control *ctcf*<sup>-/-</sup> and p53 morpholino (p53MO)-injected *ctcf*<sup>-/-</sup> embryos at 48 hpf for the up- and down-regulated peaks in control *ctcf*<sup>-/-</sup> embryos (see Fig. 3b). **b**, Motif enrichment analyses for the up-regulated ATAC peaks in control *ctcf*<sup>-/-</sup> and p53MO-injected *ctcf*<sup>-/-</sup> embryos at 48 hpf. The 3 motifs with the lowest p-values are shown for each case. **c**, Gene expression fold change from RNA-seq data of the *tp53* gene and the p53 target genes *mdm2*, *cdkn1a*, *bbc3*, *bcl2a* and *bcl2l1*, in control *ctcf*<sup>-/-</sup> and p53MO-injected *ctcf*<sup>-/-</sup> embryos at 48 hpf.

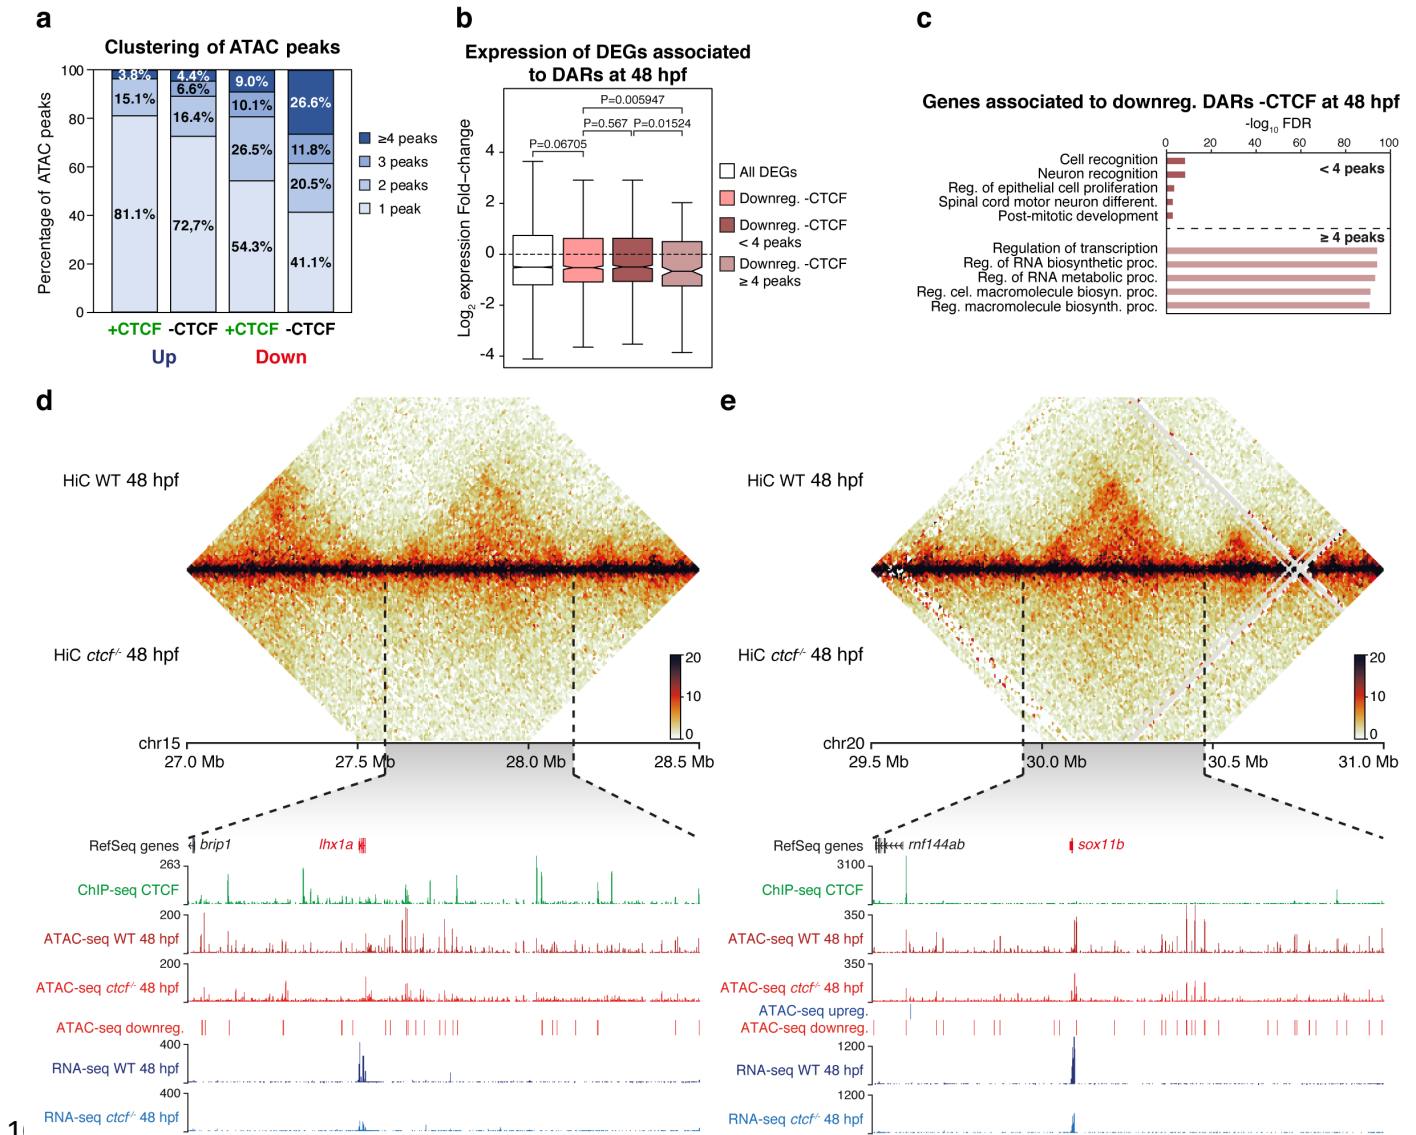

1035 **Extended Data Figure 7. CTCF loss reduces accessibility at clustered *cis*-regulatory elements around**  
 1036 **developmental genes. a**, Bar plots showing the level of clustering of the up- and down-regulated ATAC-seq peaks  
 1037 in *ctcf*<sup>-/-</sup> embryos at 48 hpf, with or without CTCF binding. Peaks were considered to be clustered when located less  
 1038 than 30 Kb from each other. **b**, Box plots showing the expression fold-change in *ctcf*<sup>-/-</sup> embryos at 48 hpf of all DEGs  
 1039 or only those associated with down-regulated DARs not overlapping with CTCF sites, grouped in less or more than  
 1040 4 peaks per cluster. Center line, median; box limits, upper and lower quartiles; whiskers, 1.5x interquartile range;  
 1041 notches, 95% confidence interval of the median Statistical significance was assessed using the Wilcoxon's rank  
 1042 sum test. **c**, GO enrichment analyses of biological processes for the genes associated with the down-regulated  
 1043 DARs in *ctcf*<sup>-/-</sup> embryos at 48 hpf not overlapping with CTCF sites, grouped in less or more than 4 peaks per cluster.  
 1044 Top-5 terms showing an FDR < 0.05 are considered as enriched. **d**, Top, heatmaps showing HiC signal in WT and  
 1045 *ctcf*<sup>-/-</sup> embryos at 48 hpf in a 1.5-Mb region of chromosomes 15 (left) or 20 (right). Bottom, zoom within the *lhx1a*  
 1046 TAD (left) or the *sox11b* TAD (right) showing UCSC Genome Browser tracks with CTCF ChIP-seq, ATAC-seq at  
 1047 48 hpf in WT and *ctcf*<sup>-/-</sup> embryos, ATAC-seq up- or down-regulated peaks and RNA-seq at 48 hpf in WT and  
 1048 *ctcf*<sup>-/-</sup> embryos. The down-regulated genes are shown in red.  
 1049

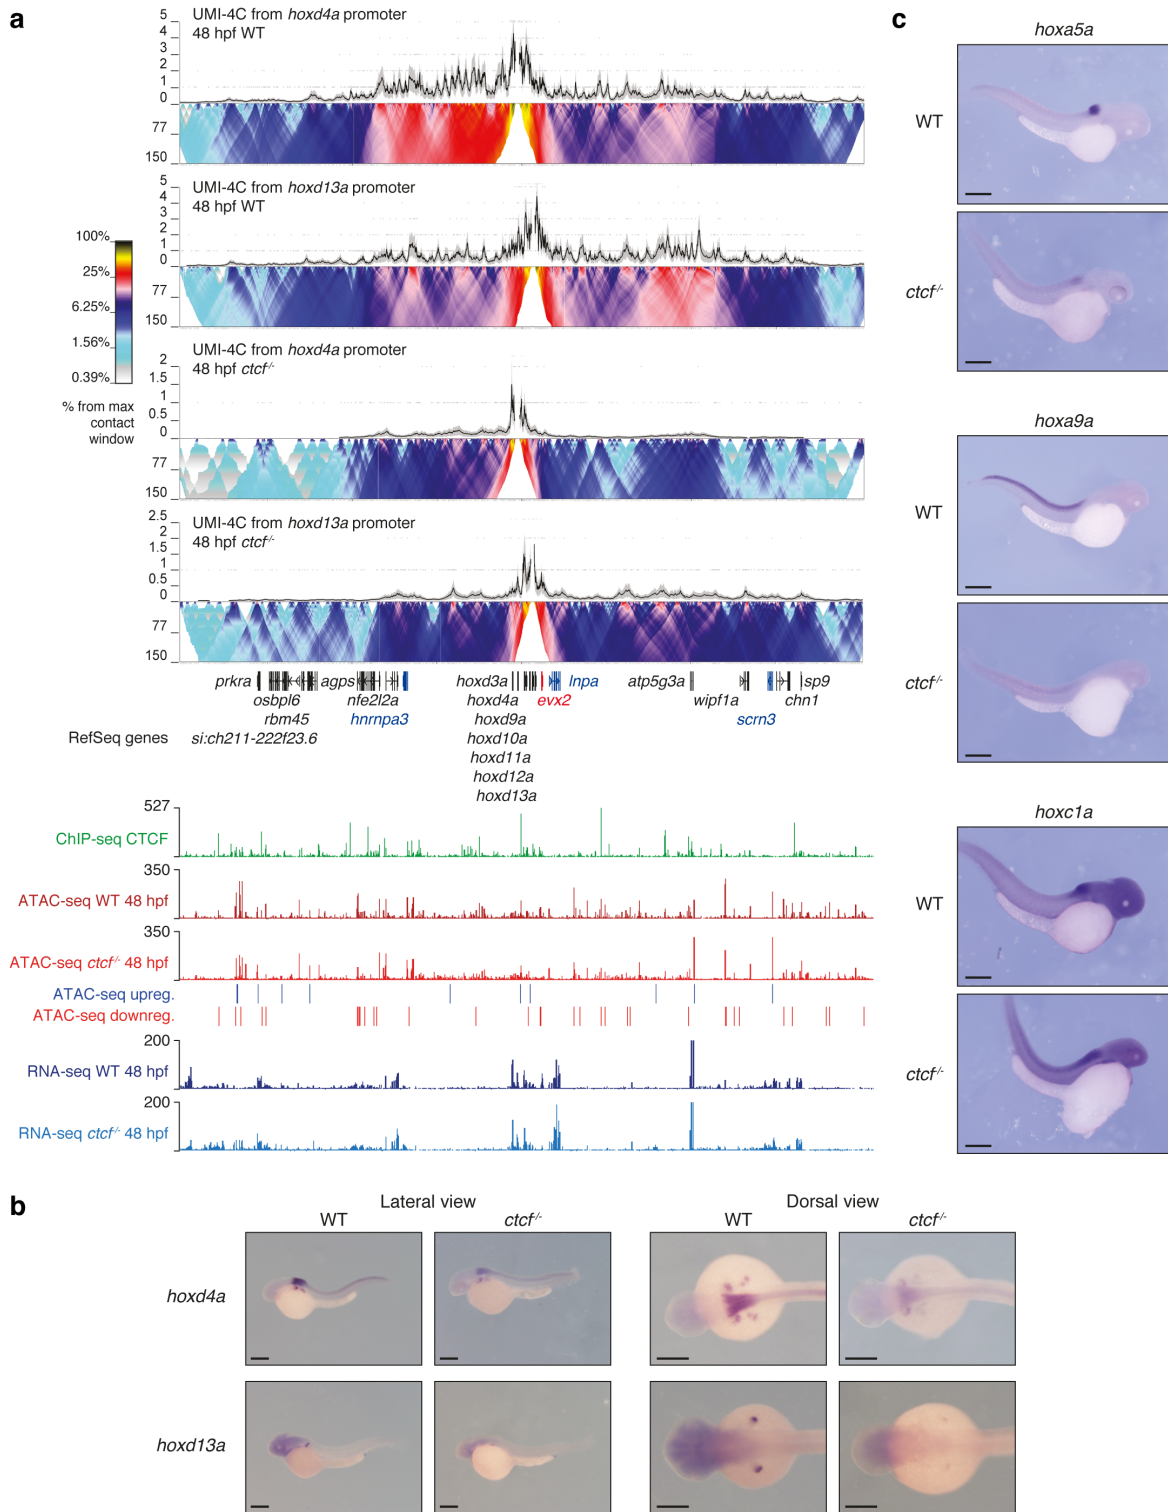

1050

1051

1052

1053

1054

1055

1056

1057

1058

1059

1060

1061

**Extended Data Figure 8. CTCF is required for the establishment of regulatory landscapes at the HoxD locus and *hox* gene expression.** **a**, Top, UMI-4C assays in WT and *ctcf*<sup>-/-</sup> embryos at 48 hpf using the *hoxd4a* and *hoxd13a* gene promoters as viewpoints. Black lines and grey shadows represent the average normalized UMI counts and their standard deviation, respectively. Domainograms below UMI counts represent contact frequency between pairs of genomic regions. Bottom, UCSC Genome Browser tracks with CTCF ChIP-seq, ATAC-seq at 48 hpf in WT and *ctcf*<sup>-/-</sup> embryos, ATAC-seq up- and down-regulated peaks and RNA-seq at 48 hpf in WT and *ctcf*<sup>-/-</sup> embryos. Up- and down-regulated genes are shown in blue and red, respectively. **b**, Whole-mount *in situ* hybridization of the *hoxd4a* and *hoxd13a* genes in WT and *ctcf*<sup>-/-</sup> embryos at 48 hpf. Left, lateral view; right, dorsal view. Anterior is to the left and scale bars represent 500  $\mu$ m. **c**, Whole-mount *in situ* hybridization of the *hoxa5a*, *hoxa9a* and *hoxc1a* genes in WT and *ctcf*<sup>-/-</sup> embryos at 48 hpf. Left, Anterior is to the right and scale bars represent 500  $\mu$ m.
